# Supplementary material for: Carbon storage in the seagrass meadows of Gazi Bay, Kenya
Source: PLoS One. 2017 May 10;12(5):e0177001. doi: 10.1371/journal.pone.0177001 (PMC5425023; doi:10.1371/journal.pone.0177001)
Supplement: S1 File — (XLSX) [file pone.0177001.s001.xlsx]

## Sheet: T. hemprichii
T. hemprichii
Core	Treatment	Depth	Section (cm)	B.density	% Organic matter	% Corg (gC per 100g sediment	C.density (gC per cm3)	C. density of section (gC per cm2)	C. stock in 50cm core (gC per cm2)	Equivalent C. stock in 100cm core (gC per cm2)	Equivalent C. stock in 100cm core (gC per m2)	Equivalent C. stock in 100cm core (MgC per m2)	Equivalent C. stock in 100cm core (MgC per ha)
THQ1	Vegetated	0-5	5	0.815	6.49942	2.46475	0.0401754	0.200877
	Vegetated	5-10	5	1.365	4.72807	1.70307	0.0464939	0.232469
	Vegetated	10-15	5	2.01	3.14838	1.02381	0.041157	0.205785
	Vegetated	15-20	5	1.355	2.41879	0.71008	0.0192432	0.0962158
	Vegetated	20-25	5	1.345	3.36646	1.11758	0.0300629	0.150314
	Vegetated	25-30	5	1.24	5.88628	2.2011	0.0545873	0.272937
	Vegetated	30-35	5	1.135	4.09796	1.43212	0.0325092	0.162546
	Vegetated	35-40	5	1.025	5.01843	1.82792	0.0374725	0.187362
	Vegetated	40-45	5	0.85	3.5993	1.2177	0.0207009	0.103504
	Vegetated	45-50	5	0.915	3.72747	1.27281	0.0232924	0.116462	1.72847	3.45695	34569.5	0.0345695	345.695
THQ2	Vegetated	0-5	5	0.85	4.14921	1.45416	0.0247207	0.123604
	Vegetated	5-10	5	0.96	4.43552	1.57727	0.0302837	0.151418
	Vegetated	10-15	5	1.315	3.89924	1.34668	0.0354176	0.177088
	Vegetated	15-20	5	1.485	3.38793	1.12681	0.0334662	0.167331
	Vegetated	20-25	5	1.425	2.77865	0.86482	0.0246474	0.123237
	Vegetated	25-30	5	1.44	3.15893	1.02834	0.0296162	0.148081
	Vegetated	30-35	5	1.41	3.19865	1.04542	0.0294809	0.147404
	Vegetated	35-40	5	1.325	3.11911	1.01122	0.0267972	0.133986
	Vegetated	40-45	5	1.22	3.77924	1.29507	0.0315998	0.157999
	Vegetated	45-50	5	1.39	2.93941	0.933947	0.0259637	0.129819	1.45997	2.91993	29199.3	0.0291993	291.993
THQ3	Vegetated	0-5	5	1.225	2.00921	0.53396	0.013082	0.0654101
	Vegetated	5-10	5	1.175	2.35782	0.683862	0.0160708	0.0803538
	Vegetated	10-15	5	1.44	2.01942	0.53835	0.0155045	0.0775224
	Vegetated	15-20	5	1.44	2.24847	0.636843	0.0183411	0.0917053
	Vegetated	20-25	5	1.475	2.82771	0.885915	0.0261345	0.130673
	Vegetated	25-30	5	1.71	2.7589	0.856325	0.0292863	0.146432
	Vegetated	30-35	5	1.495	1.81764	0.451583	0.0135023	0.0675117
	Vegetated	35-40	5	1.5	3.51823	1.18284	0.0354851	0.177426
	Vegetated	40-45	5	1.385	5.51792	2.04271	0.056583	0.282915
	Vegetated	45-50	5	1.395	2.7986	0.873398	0.0243678	0.121839	1.24179	2.48357	24835.7	0.0248357	248.357
THQ4	Vegetated	0-5	5	0.735	1.75872	0.42625	0.00626588	0.0313294
	Vegetated	5-10	5	1.1	1.94855	0.507876	0.0111733	0.0558664
	Vegetated	10-15	5	1.44	2.64921	0.809161	0.0233038	0.116519
	Vegetated	15-20	5	1.48	2.72756	0.842851	0.0249484	0.124742
	Vegetated	20-25	5	1.62	2.26818	0.645319	0.0209083	0.104542
	Vegetated	25-30	5	0.155	2.19808	0.615174	0.00190704	0.0095352
	Vegetated	30-35	5	1.565	3.26609	1.07442	0.0336293	0.168146
	Vegetated	35-40	5	1.555	1.66932	0.387807	0.0120608	0.060304
	Vegetated	40-45	5	1.49	3.20967	1.05016	0.0312947	0.156474
	Vegetated	45-50	5	1.47	2.73829	0.847466	0.0249155	0.124578	0.952035	1.90407	19040.7	0.0190407	190.407
THQ5	Vegetated	0-5	5	0.72	1.9288	0.499384	0.00719112	0.0359556
	Vegetated	5-10	5	1.145	0.8295	0.1218	0.00278922	0.0139461
	Vegetated	10-15	5	1.05	1.92802	0.499048	0.01048	0.0524
	Vegetated	15-20	5	1.215	1.2595	0.211583	0.00514148	0.0257074
	Vegetated	20-25	5	1.4	3.00754	0.963243	0.0269708	0.134854
	Vegetated	25-30	5	1.585	1.83908	0.460805	0.0146075	0.0730377
	Vegetated	30-35	5	1.59	3.07741	0.993287	0.0315865	0.157933
	Vegetated	35-40	5	1.565	4.31574	1.52577	0.0477565	0.238783
	Vegetated	40-45	5	1.605	1.17893	0.26157	0.0083964	0.041982
	Vegetated	45-50	5	1.515	1.1888	0.26552	0.00804525	0.0402262	0.814824	1.62965	16296.5	0.0162965	162.965
THQ6	Vegetated	0-5	5	1.395	2.19956	0.615809	0.0171811	0.0859054
	Vegetated	5-10	5	1.565	2.26886	0.645612	0.0202076	0.101038
	Vegetated	10-15	5	1.56	2.34813	0.679695	0.0212065	0.106032
	Vegetated	15-20	5	1.55	2.31768	0.666603	0.0206647	0.103324
	Vegetated	20-25	5	1.55	3.08837	0.998	0.030938	0.15469
	Vegetated	25-30	5	1.645	2.20899	0.619865	0.0203936	0.101968
	Vegetated	30-35	5	1.58	2.43831	0.718472	0.0227037	0.113519
	Vegetated	35-40	5	1.44	2.06855	0.559478	0.016113	0.0805648
	Vegetated	40-45	5	1.36	2.11791	0.5807	0.015795	0.0789752
	Vegetated	45-50	5	1.37	1.9492	0.508155	0.0139235	0.0696173	0.995633	1.99127	19912.7	0.0199127	199.127
THQ7	Vegetated	0-5	5	1	3.62856	1.23028	0.0246056	0.123028
	Vegetated	5-10	5	1.4	2.70865	0.834722	0.0233722	0.116861
	Vegetated	10-15	5	1.385	3.26803	1.07525	0.0297845	0.148922
	Vegetated	15-20	5	1.59	2.24849	0.636851	0.0202519	0.101259
	Vegetated	20-25	5	1.705	1.71857	0.408985	0.0139464	0.0697319
	Vegetated	25-30	5	1.58	1.44943	0.293253	0.0092668	0.046334
	Vegetated	30-35	5	1.61	1.4797	0.306273	0.00986198	0.0493099
	Vegetated	35-40	5	1.49	3.4258	1.14309	0.0340641	0.170321
	Vegetated	40-45	5	1.375	3.10882	1.00679	0.0276869	0.138434
	Vegetated	45-50	5	1.425	1.91894	0.495146	0.0141117	0.0705583	1.03476	2.06952	20695.2	0.0206952	206.952
THQ8	Vegetated	0-5	5	0.945	2.62868	0.800333	0.0151263	0.0756314
	Vegetated	5-10	5	1.235	4.1376	1.44917	0.0357944	0.178972
	Vegetated	10-15	5	1.415	2.54899	0.766066	0.0216797	0.108398
	Vegetated	15-20	5	1.465	2.11813	0.580797	0.0170173	0.0850867
	Vegetated	20-25	5	1.285	2.52875	0.757364	0.0194642	0.0973212
	Vegetated	25-30	5	1.54	2.8169	0.881268	0.0271431	0.135715
	Vegetated	30-35	5	1.485	1.68899	0.396264	0.011769	0.0588452
	Vegetated	35-40	5	1.47	1.52924	0.327573	0.00963063	0.0481532
	Vegetated	40-45	5	1.34	1.86758	0.473057	0.0126779	0.0633897
	Vegetated	45-50	5	1.32	1.49866	0.314425	0.00830083	0.0415041	0.893017	1.78603	17860.3	0.0178603	178.603
THQ9	Vegetated	0-5	5	0.79	2.76945	0.860862	0.0136016	0.0680081
	Vegetated	5-10	5	1.335	2.71919	0.839252	0.022408	0.11204
	Vegetated	10-15	5	1.495	1.6883	0.395969	0.0118395	0.0591974
	Vegetated	15-20	5	1.505	2.41927	0.710285	0.0213796	0.106898
	Vegetated	20-25	5	1.49	1.55	0.3365	0.0100277	0.0501385
	Vegetated	25-30	5	1.57	1.49884	0.314503	0.0098754	0.049377
	Vegetated	30-35	5	1.68	2.33919	0.675851	0.0227086	0.113543
	Vegetated	35-40	5	1.5	1.48884	0.310201	0.00930602	0.0465301
	Vegetated	40-45	5	1.4	1.68878	0.396178	0.011093	0.0554649	0.702701	1.4054	14054	0.014054	140.54
	Vegetated	45-50	5	1.385	1.81963	0.45244	0.0125326	0.062663
THQ10	Vegetated	0-5	5	1.83439	2.6169	0.795267	0.0291767	0.145883
	Vegetated	5-10	5	1.58981	2.19756	0.614951	0.0195531	0.0977655
	Vegetated	10-15	5	1.56943	2.14357	0.591736	0.0185737	0.0928686
	Vegetated	15-20	5	1.46752	4.38277	1.55459	0.0456278	0.228139
	Vegetated	20-25	5	1.40637	3.41552	1.13867	0.0320279	0.16014
	Vegetated	25-30	5	1.52866	3.41	1.1363	0.0347404	0.173702
	Vegetated	30-35	5	1.32484	3.38512	1.1256	0.0298249	0.149124
	Vegetated	35-40	5	1.46752	1.08531	0.224125	0.00657815	0.0328907
	Vegetated	40-45	5	1.30446	1.55066	0.336785	0.00878644	0.0439322
	Vegetated	45-50	5	1.38599	1.80565	0.446428	0.0123749	0.0618744	1.18632	2.37264	23726.4	0.0237264	237.264
TH ZQ11	Vegetated	0-5	5	0.957962	1.72783	0.412966	0.00791211	0.0395605
	Vegetated	5-10	5	1.16178	5.13758	1.87916	0.0436635	0.218318
	Vegetated	10-15	5	1.28408	3.21486	1.05239	0.0270269	0.135135
	Vegetated	15-20	5	1.28408	4.03102	1.40334	0.0360398	0.180199
	Vegetated	20-25	5	1.30446	3.29964	1.08885	0.0284071	0.142036
	Vegetated	25-30	5	1.22293	5.18224	1.89836	0.0464313	0.232156
	Vegetated	30-35	5	1.44713	4.23028	1.48902	0.0430962	0.215481
	Vegetated	35-40	5	1.42675	3.89546	1.34505	0.0383809	0.191905
	Vegetated	40-45	5	1.54904	4.13793	1.44931	0.0449009	0.224505
	Vegetated	45-50	5	1.52866	3.40312	1.13334	0.0346499	0.173249	1.75254	3.50509	35050.9	0.0350509	350.509
TH ZQ12	Vegetated	0-5	5	1.12102	4.05443	1.41341	0.0316891	0.158445
	Vegetated	5-10	5	1.22293	3.5643	1.20265	0.0294151	0.147075
	Vegetated	10-15	5	1.44713	4.23214	1.48982	0.0431194	0.215597
	Vegetated	15-20	5	1.36561	6.40872	2.42575	0.0662523	0.331261
	Vegetated	20-25	5	1.32484	3.66224	1.24476	0.0329823	0.164911
	Vegetated	25-30	5	1.36561	4.7345	1.70583	0.0465899	0.232949
	Vegetated	30-35	5	1.38599	4.9953	1.81798	0.0503939	0.25197
	Vegetated	35-40	5	1.38599	4.37793	1.55251	0.0430352	0.215176
	Vegetated	40-45	5	1.52866	3.54168	1.19292	0.0364715	0.182358
	Vegetated	45-50	5	1.52866	4.31593	1.52585	0.0466502	0.233251	2.13299	4.26599	42659.9	0.0426599	426.599
TH ZQ13	Vegetated	0-5	5	1.44	2.42802	0.714049	0.0205646	0.102823
	Vegetated	5-10	5	1.44	2.53827	0.761454	0.0219299	0.109649
	Vegetated	10-15	5	1.26	1.05919	0.125453	0.00316141	0.0158071
	Vegetated	15-20	5	1.4	1.44898	0.293063	0.00820575	0.0410288
	Vegetated	20-25	5	1.54	3.36872	1.11855	0.0344513	0.172257
	Vegetated	25-30	5	1.38	1.97981	0.521317	0.0143884	0.0719418
	Vegetated	30-35	5	1.3	2.10858	0.57669	0.0149939	0.0749697
	Vegetated	35-40	5	1.52	1.48956	0.310509	0.00943948	0.0471974
	Vegetated	40-45	5	1.56	2.43855	0.718578	0.0224196	0.112098
	Vegetated	45-50	5	1.42	1.98901	0.525275	0.0149178	0.074589	0.822361	1.64472	16447.2	0.0164472	164.472
TH ZQ14	Vegetated	0-5	5	1.08	1.71935	0.409321	0.00884134	0.0442067
	Vegetated	5-10	5	1.38	1.96793	0.516209	0.0142474	0.0712369
	Vegetated	10-15	5	1.36	0.849604	0.129842	0.0035317	0.0176585
	Vegetated	15-20	5	1.3	1.73778	0.485113	0.0126129	0.0630647
	Vegetated	20-25	5	1.46	1.07892	0.133936	0.00391093	0.0195547
	Vegetated	25-30	5	1.42	1.74863	0.421909	0.0119822	0.0599111
	Vegetated	30-35	5	1.04	2.37841	0.692716	0.0144085	0.0720425
	Vegetated	35-40	5	1.38	2.2076	0.619267	0.0170918	0.0854589
	Vegetated	40-45	5	1.3	1.55906	0.340398	0.00885034	0.0442517
	Vegetated	45-50	5	1.36	3.56783	1.20417	0.0327533	0.163767	0.641152	1.2823	12823	0.012823	128.23
TH ZQ15	Vegetated	0-5	5	1.42	2.48899	0.740264	0.0210235	0.105118
	Vegetated	5-10	5	1.56	2.63946	0.80497	0.0251151	0.125575
	Vegetated	10-15	5	1.52	2.37778	0.692446	0.0210503	0.105252
	Vegetated	15-20	5	1.72	2.1685	0.602454	0.0207244	0.103622
	Vegetated	20-25	5	1.8	1.98902	0.525279	0.01891	0.0945502
	Vegetated	25-30	5	1.74	3.42569	1.14305	0.039778	0.19889
	Vegetated	30-35	5	1.68	3.17811	1.03659	0.0348293	0.174146
	Vegetated	35-40	5	1.7	1.95866	0.512223	0.0174156	0.0870779
	Vegetated	40-45	5	1.68	2.02674	0.5415	0.0181944	0.0909719
	Vegetated	45-50	5	1.66	2.01818	0.537819	0.0178556	0.0892779	1.17448	2.34896	23489.6	0.0234896	234.896
Q1	Non-vegetated	0-5	5	1.845	1.5289	0.401559	0.00740877	0.0370438
	Non-vegetated	5-10	5	1.97	1.3778	0.341118	0.00672003	0.0336001
	Non-vegetated	10-15	5	1.96	0.249928	-0.110029	-0.00215656	-0.0107828
	Non-vegetated	15-20	5	1.98	1.74896	0.489584	0.00969377	0.0484688
	Non-vegetated	20-25	5	1.655	1.74823	0.48929	0.00809776	0.0404888
	Non-vegetated	25-30	5	1.47	1.42844	0.361375	0.00531221	0.0265611
	Non-vegetated	30-35	5	1.425	1.27873	0.301492	0.00429626	0.0214813
	Non-vegetated	35-40	5	1.97	1.36959	0.337837	0.00665539	0.0332769
	Non-vegetated	40-45	5	1.395	2.05876	0.555269	0.007746	0.03873
	Non-vegetated	45-50	5	1.04	1.71418	0.475671	0.00494698	0.0247349	0.293603	0.652451	6524.51	0.00652451	65.2451
Q2	Non-vegetated	0-5	5	1.685	0.88944	0.145776	0.00245633	0.0122816
	Non-vegetated	5-10	5	1.925	0.559445	0.0137778	0.000265223	0.00132612
	Non-vegetated	10-15	5	1.885	1.37886	0.341545	0.00643812	0.0321906
	Non-vegetated	15-20	5	1.925	1.13851	0.245406	0.00472406	0.0236203
	Non-vegetated	20-25	5	1.93	1.20922	0.273689	0.0052822	0.026411
	Non-vegetated	25-30	5	0.695	1.2395	0.285799	0.0019863	0.0099315
	Non-vegetated	30-35	5	1.86	1.94915	0.569661	0.0105957	0.0529785
	Non-vegetated	35-40	5	1.47	1.61965	0.437861	0.00643655	0.0321828
	Non-vegetated	40-45	5	0.92	2.1389	0.589727	0.00542549	0.0271275
	Non-vegetated	45-50	5	1.395	2.35764	0.683786	0.00953882	0.0476941	0.265744	0.590542	5905.42	0.00590542	59.0542
Q3	Non-vegetated	0-5	5	1.53	0.909732	0.153893	0.00235456	0.0117728
	Non-vegetated	5-10	5	1.595	0.289782	-0.205394	-0.00327603	-0.0163801
	Non-vegetated	10-15	5	1.695	0.529626	0.00185052	3.13664e-05	0.000156832
	Non-vegetated	15-20	5	1.875	0.939285	0.165714	0.00310714	0.0155357
	Non-vegetated	20-25	5	1.865	0.509566	-0.00617344	-0.000115135	-0.000575674
	Non-vegetated	25-30	5	1.795	0.52988	0.00195203	3.50389e-05	0.000175195
	Non-vegetated	30-35	5	1.78	1.29936	0.309744	0.00551345	0.0275672
	Non-vegetated	35-40	5	1.68	0.819602	0.117841	0.00197973	0.00989864
	Non-vegetated	40-45	5	1.415	2.75844	0.85613	0.0121142	0.0605712
	Non-vegetated	45-50	5	1.33	0.589766	0.0259064	0.000344556	0.00172278	0.110445	0.245432	2454.32	0.00245432	24.5432
Q4	Non-vegetated	0-5	5	0.765	1.77858	0.501431	0.00383595	0.0191797
	Non-vegetated	5-10	5	0.92	2.14893	0.594041	0.00546518	0.0273259
	Non-vegetated	10-15	5	1.045	1.64885	0.449542	0.00469771	0.0234886
	Non-vegetated	15-20	5	1.12	0.929365	0.0696268	0.00077982	0.0038991
	Non-vegetated	20-25	5	1.19	1.0888	0.138183	0.00164438	0.00822189
	Non-vegetated	25-30	5	1.04	1.57828	0.348662	0.00362609	0.0181304
	Non-vegetated	30-35	5	1.03	1.59904	0.357587	0.00368315	0.0184158
	Non-vegetated	35-40	5	1	2.06772	0.559118	0.00559118	0.0279559
	Non-vegetated	40-45	5	0.9	1.68832	0.46533	0.00418797	0.0209398
	Non-vegetated	45-50	5	0.805	1.92808	0.561234	0.00451793	0.0225897	0.190147	0.422548	4225.48	0.00422548	42.2548
Q5	Non-vegetated	0-5	5	1.06	1.25937	0.293747	0.00311371	0.0155686
	Non-vegetated	5-10	5	1.36	1.03953	0.205811	0.00279903	0.0139952
	Non-vegetated	10-15	5	1.06	0.879297	0.141719	0.00150222	0.00751109
	Non-vegetated	15-20	5	1.08	1.4091	0.353639	0.0038193	0.0190965
	Non-vegetated	20-25	5	0.86	2.89884	0.916501	0.00788191	0.0394096
	Non-vegetated	25-30	5	1.1	2.09896	0.572551	0.00629807	0.0314903
	Non-vegetated	30-35	5	1.16	2.66892	0.817636	0.00948458	0.0474229
	Non-vegetated	35-40	5	1.1	2.30863	0.66271	0.00728981	0.0364491
	Non-vegetated	40-45	5	0.76	3.20936	1.05003	0.0079802	0.039901
	Non-vegetated	45-50	5	0.86	3.24	1.0632	0.00914352	0.0457176	0.296562	0.659026	6590.26	0.00659026	65.9026

## Sheet: E.acoroides
E. acoroides
Core	Treatment	Depth	Section (cm)	B. density	% Organic matter	% Corg (gC per 100g sediment	C.density (gC per cm3)	C. density of section (gC per cm2)	C. stock in 50cm core (gC per cm2)	Equivalent C. stock in 100cm core (gC per cm2)	Equivalent C. stock in 100cm core (gC per m2)	Equivalent C. stock in 100cm core (MgC per m2)	Equivalent C. stock in 100cm core (MgC per ha)
Q1	Vegetated	0-5	5	1.02	2.88096	0.908814	0.0185398	0.092699
	Vegetated	5-10	5	1.26	1.21902	0.194181	0.00489335	0.0244668
	Vegetated	10-15	5	1.34	5.09389	1.86037	0.049858	0.24929
	Vegetated	15-20	5	1.58	2.87483	0.906175	0.0286351	0.143176
	Vegetated	20-25	5	1.44	2.51547	0.751653	0.0216476	0.108238
	Vegetated	25-30	5	1.52	4.3765	1.55189	0.0471776	0.235888
	Vegetated	30-35	5	1.42	3.8546	1.32748	0.0377004	0.188502
	Vegetated	35-40	5	1.42	9.34318	3.68757	0.104727	0.523635
	Vegetated	40-45	5	1.28	3.79992	1.30397	0.0333815	0.166908
	Vegetated	45-50	5	1.36	2.61948	0.796375	0.0216614	0.108307	1.84111	3.68222	36822.2	0.0368222	368.222
Q2	Vegetated	0-5	5	1.02	2.84926	0.895181	0.0182617	0.0913085
	Vegetated	5-10	5	1.2	3.11769	1.01061	0.0242545	0.121273
	Vegetated	10-15	5	1.28	2.51575	0.751772	0.0192454	0.0962268
	Vegetated	15-20	5	1.44	2.54385	0.763854	0.021999	0.109995
	Vegetated	20-25	5	1.42	7.46051	2.87802	0.0817357	0.408679
	Vegetated	25-30	5	1.4	3.11894	1.01114	0.028312	0.14156
	Vegetated	30-35	5	1.5	2.89748	0.915916	0.0274775	0.137387
	Vegetated	35-40	5	1.42	2.22538	0.626912	0.0178043	0.0890215
	Vegetated	40-45	5	1.22	2.51548	0.751658	0.0183405	0.0917023
	Vegetated	45-50	5	1.2	2.42561	0.713013	0.0171123	0.0855616	1.37271	2.74543	27454.3	0.0274543	274.543
Q3	Vegetated	0-5	5	0.92	10.4145	4.14825	0.0763279	0.381639
	Vegetated	5-10	5	0.82	3.94668	1.36707	0.02242	0.1121
	Vegetated	10-15	5	0.92	5.46936	2.02182	0.0372016	0.186008
	Vegetated	15-20	5	0.82	4.87303	1.7654	0.0289526	0.144763
	Vegetated	20-25	5	0.96	4.91361	1.78285	0.0342307	0.171154
	Vegetated	25-30	5	0.92	5.94717	2.22728	0.040982	0.20491
	Vegetated	30-35	5	1.08	5.30126	1.94954	0.0421101	0.21055
	Vegetated	35-40	5	1.1	5.45189	2.01431	0.0443149	0.221575
	Vegetated	40-45	5	0.98	2.26238	0.642823	0.0125993	0.0629967
	Vegetated	45-50	5	0.96	3.2191	1.05421	0.0202409	0.101204	1.7969	3.5938	35938	0.035938	359.38
Q4	Vegetated	0-5	5	1.04	2.21734	0.623456	0.0129679	0.0648394
	Vegetated	5-10	5	1.36	2.09896	0.572553	0.0155734	0.0778672
	Vegetated	10-15	5	1.36	3.22792	1.058	0.0287777	0.143889
	Vegetated	15-20	5	1.26	2.66708	0.816844	0.0205845	0.102922
	Vegetated	20-25	5	1.32	1.52897	0.327456	0.00864483	0.0432242
	Vegetated	25-30	5	1.2	2.74727	0.851327	0.0204319	0.102159
	Vegetated	30-35	5	1.24	3.29767	1.088	0.0269824	0.134912
	Vegetated	35-40	5	1.2	4.27572	1.50856	0.0362055	0.181027
	Vegetated	40-45	5	0.74	1.9175	0.494526	0.00731898	0.0365949
	Vegetated	45-50	5	0.92	1.90865	0.490722	0.00902928	0.0451464	0.932582	1.86516	18651.6	0.0186516	186.516
Q5	Vegetated	0-5	5	0.88	2.72596	0.842162	0.0148221	0.0741103
	Vegetated	5-10	5	0.92	1.51865	0.323019	0.00594355	0.0297178
	Vegetated	10-15	5	1	1.64841	0.378816	0.00757632	0.0378816
	Vegetated	15-20	5	1.04	2.20843	0.619624	0.0128882	0.0644409
	Vegetated	20-25	5	0.94	1.87929	0.478094	0.00898817	0.0449408
	Vegetated	25-30	5	1.14	3.27672	1.07899	0.024601	0.123005
	Vegetated	30-35	5	1.04	1.85817	0.469015	0.00975551	0.0487775
	Vegetated	35-40	5	0.96	2.15803	0.597952	0.0114807	0.0574034
	Vegetated	40-45	5	1.16	1.62855	0.370278	0.00859045	0.0429522	0.568376	1.13675	11367.5	0.0113675	113.675
	Vegetated	45-50	5	1.04	1.72915	0.413536	0.00860154	0.0430077
Q6	Vegetated	0-5	5	1.28	2.53848	0.761545	0.0194956	0.0974778
	Vegetated	5-10	5	1.4	2.25684	0.640441	0.0179324	0.0896618
	Vegetated	10-15	5	1.4	2.64871	0.808946	0.0226505	0.113252
	Vegetated	15-20	5	1.44	2.20876	0.619765	0.0178492	0.0892462
	Vegetated	20-25	5	1.46	1.97902	0.520977	0.0152125	0.0760627
	Vegetated	25-30	5	1.36	2.09156	0.569372	0.0154869	0.0774346
	Vegetated	30-35	5	1.5	1.74907	0.422102	0.0126631	0.0633153
	Vegetated	35-40	5	1.28	2.69766	0.829992	0.0212478	0.106239
	Vegetated	40-45	5	1.06	3.25781	1.07086	0.0227022	0.113511
	Vegetated	45-50	5	1.26	1.00993	0.104272	0.00262764	0.0131382	0.839339	1.67868	16786.8	0.0167868	167.868
Q7	Vegetated	0-5	5	1.56	2.09882	0.572495	0.0178618	0.0893092
	Vegetated	5-10	5	1.54	2.76742	0.859988	0.0264876	0.132438
	Vegetated	10-15	5	1.56	2.29809	0.65818	0.0205352	0.102676
	Vegetated	15-20	5	1.62	3.75775	1.28583	0.0416609	0.208305
	Vegetated	20-25	5	1.6	2.75758	0.85576	0.0273843	0.136922
	Vegetated	25-30	5	1.56	2.15955	0.598606	0.0186765	0.0933825
	Vegetated	30-35	5	1.32	2.82941	0.886647	0.0234075	0.117037
	Vegetated	35-40	5	1.28	2.22916	0.62854	0.0160906	0.0804531
	Vegetated	40-45	5	1.24	2.61821	0.795829	0.0197366	0.0986828
	Vegetated	45-50	5	1.22	2.53696	0.760891	0.0185657	0.0928287	1.15203	2.30407	23040.7	0.0230407	230.407
Q8	Vegetated	0-5	5	1.66	2.85714	0.898571	0.0298326	0.149163
	Vegetated	5-10	5	1.68	3.95795	1.37192	0.0460965	0.230482
	Vegetated	10-15	5	1.5	3.23868	1.06263	0.031879	0.159395
	Vegetated	15-20	5	1.66	4.26744	1.505	0.049966	0.24983
	Vegetated	20-25	5	1.66	3.62662	1.22945	0.0408176	0.204088
	Vegetated	25-30	5	1.62	2.06975	0.559993	0.0181438	0.0907188
	Vegetated	30-35	5	1.66	2.60765	0.79129	0.0262708	0.131354
	Vegetated	35-40	5	1.46	2.03853	0.546566	0.0159597	0.0797986
	Vegetated	40-45	5	1.34	2.30927	0.662985	0.017768	0.08884
	Vegetated	45-50	5	1.34	3.63746	1.23411	0.0330741	0.16537	1.54904	3.09808	30980.8	0.0309808	309.808
Q9	Vegetated	0-5	5	1.74	2.65681	0.812429	0.0282725	0.141363
	Vegetated	5-10	5	1.84	3.90804	1.35046	0.0496969	0.248484
	Vegetated	10-15	5	1.52	2.36854	0.68847	0.0209295	0.104647
	Vegetated	15-20	5	1.62	2.57871	0.778844	0.0252345	0.126173
	Vegetated	20-25	5	1.68	2.168	0.602242	0.0202353	0.101177
	Vegetated	25-30	5	1.8	3.35829	1.11407	0.0401063	0.200532
	Vegetated	30-35	5	1.52	3.46633	1.16052	0.0352798	0.176399
	Vegetated	35-40	5	1.44	2.73839	0.847506	0.0244082	0.122041
	Vegetated	40-45	5	1.5	4.34614	1.53884	0.0461651	0.230826
	Vegetated	45-50	5	1.38	2.8186	0.881997	0.0243431	0.121716	1.57336	3.14671	31467.1	0.0314671	314.671
Q10	Vegetated	0-5	5	1.38	2.75834	0.856088	0.023628	0.11814
	Vegetated	5-10	5	1.64	5.27629	1.9388	0.0635928	0.317964
	Vegetated	10-15	5	1.54	4.50655	1.60782	0.0495208	0.247604
	Vegetated	15-20	5	1.72	5.46677	2.02071	0.0695124	0.347562
	Vegetated	20-25	5	1.52	5.1943	1.90355	0.0578679	0.289339
	Vegetated	25-30	5	1.46	1.48951	0.31049	0.00906629	0.0453315
	Vegetated	30-35	5	1.34	2.41781	0.709656	0.0190188	0.0950939
	Vegetated	35-40	5	1.28	2.70677	0.833909	0.0213481	0.10674
	Vegetated	40-45	5	1.16	2.13742	0.58909	0.0136669	0.0683345
	Vegetated	45-50	5	1.36	4.2	1.476	0.0401472	0.200736	1.83685	3.67369	36736.9	0.0367369	367.369
Q11	Vegetated	0-5	5	1.24	4.55691	1.62947	0.0404109	0.202055
	Vegetated	5-10	5	1.28	6.07271	2.28126	0.0584004	0.292002
	Vegetated	10-15	5	1.38	6.37546	2.41145	0.066556	0.33278
	Vegetated	15-20	5	1.54	6.67554	2.54048	0.0782468	0.391234
	Vegetated	20-25	5	1.38	6.55533	2.48879	0.0686906	0.343453
	Vegetated	25-30	5	1.44	5.903	2.20829	0.0635988	0.317994
	Vegetated	30-35	5	1.36	6.54157	2.48288	0.0675342	0.337671
	Vegetated	35-40	5	1.14	5.91683	2.21424	0.0504846	0.252423
	Vegetated	40-45	5	1.16	5.38573	1.98587	0.0460721	0.23036
	Vegetated	45-50	5	1.06	6.86451	2.62174	0.0555809	0.277904	2.97788	5.95575	59557.5	0.0595575	595.575
Q12	Vegetated	0-5	5	1.32	3.46864	1.16152	0.030664	0.15332
	Vegetated	5-10	5	1.52	3.61928	1.22629	0.0372792	0.186396
	Vegetated	10-15	5	1.5	4.27524	1.50835	0.0452506	0.226253
	Vegetated	15-20	5	1.52	4.47374	1.59371	0.0484487	0.242243
	Vegetated	20-25	5	1.54	4.4467	1.58208	0.0487281	0.243641
	Vegetated	25-30	5	1.6	4.36563	1.54722	0.0495111	0.247556
	Vegetated	30-35	5	1.82	4.37483	1.55118	0.0564629	0.282314
	Vegetated	35-40	5	1.52	5.45564	2.01592	0.0612841	0.30642
	Vegetated	40-45	5	1.2	4.38611	1.55603	0.0373447	0.186723
	Vegetated	45-50	5	1.22	6.6153	2.51458	0.0613558	0.306779	2.38165	4.76329	47632.9	0.0476329	476.329
Q13	Vegetated	0-5	5	1.52	2.27978	0.650305	0.0197693	0.0988463
	Vegetated	5-10	5	1.48	1.37835	0.262692	0.00777569	0.0388784
	Vegetated	10-15	5	1.64	2.33838	0.675503	0.0221565	0.110782
	Vegetated	15-20	5	1.7	3.38482	1.12547	0.0382661	0.191331
	Vegetated	20-25	5	1.68	1.47944	0.306159	0.010287	0.0514348
	Vegetated	25-30	5	1.6	4.08473	1.42644	0.0456459	0.22823
	Vegetated	30-35	5	1.52	2.90655	0.919818	0.0279625	0.139812
	Vegetated	35-40	5	1.42	1.47822	0.305634	0.00868	0.0434
	Vegetated	40-45	5	1.14	0.939712	0.0740762	0.00168894	0.00844469
	Vegetated	45-50	5	0.98	1.48932	0.31041	0.00608403	0.0304201	0.941579	1.88316	18831.6	0.0188316	188.316
Q14	Vegetated	0-5	5	1.42	2.87815	0.907603	0.0257759	0.12888
	Vegetated	5-10	5	1.7	4.00722	1.39311	0.0473656	0.236828
	Vegetated	10-15	5	1.64	2.20953	0.620099	0.0203392	0.101696
	Vegetated	15-20	5	1.86	1.77915	0.435034	0.0161833	0.0809163
	Vegetated	20-25	5	1.7	2.25886	0.64131	0.0218045	0.109023
	Vegetated	25-30	5	1.38	3.86922	1.33376	0.0368119	0.18406
	Vegetated	30-35	5	1.44	1.95726	0.511622	0.0147347	0.0736735
	Vegetated	35-40	5	1.44	4.00667	1.39287	0.0401146	0.200573
	Vegetated	40-45	5	1.2	1.75945	0.426564	0.0102375	0.0511877
	Vegetated	45-50	5	1.28	2.01798	0.537732	0.0137659	0.0688297	1.23567	2.47133	24713.3	0.0247133	247.133
Q15	Vegetated	0-5	5	1.18	2.87815	0.907603	0.0214194	0.107097
	Vegetated	5-10	5	1.48	4.00722	1.39311	0.0412359	0.20618
	Vegetated	10-15	5	1.38	2.20953	0.620099	0.0171147	0.0855736
	Vegetated	15-20	5	1.34	1.77915	0.435034	0.0116589	0.0582946
	Vegetated	20-25	5	1.48	2.25886	0.64131	0.0189828	0.0949139
	Vegetated	25-30	5	1.54	3.86922	1.33376	0.04108	0.2054
	Vegetated	30-35	5	1.52	1.95726	0.511622	0.0155533	0.0777665
	Vegetated	35-40	5	1.5	4.00667	1.39287	0.0417861	0.20893
	Vegetated	40-45	5	1.38	1.75945	0.426564	0.0117732	0.0588659
	Vegetated	45-50	5	1.46	2.01798	0.537732	0.0157018	0.0785089	1.18153	2.36306	23630.6	0.0236306	236.306
Q1	Non-vegetated	0-5	5	1.79	0.329736	-0.0781055	-0.00139809	-0.00699044
	Non-vegetated	5-10	5	1.98	0.619628	0.0378513	0.000749456	0.00374728
	Non-vegetated	10-15	5	1.965	0.619479	0.0377916	0.000742604	0.00371302
	Non-vegetated	15-20	5	1.975	1.53888	0.405554	0.00800969	0.0400485
	Non-vegetated	20-25	5	2.01	0.888578	0.145431	0.00292317	0.0146158
	Non-vegetated	25-30	5	1.795	1.02825	0.201299	0.00361331	0.0180666
	Non-vegetated	30-35	5	1.795	1.07978	0.221914	0.00398335	0.0199167
	Non-vegetated	35-40	5	1.485	0.888662	0.145465	0.00216015	0.0108008
	Non-vegetated	40-45	5	1.245	0.899293	0.149717	0.00186398	0.00931989
	Non-vegetated	45-50	5	1.385	0.969471	0.177788	0.00246237	0.0123118	0.12555	0.279	2790	0.00279	27.9
Q2	Non-vegetated	0-5	5	1.345	0.389916	-0.0540336	-0.000726752	-0.00363376
	Non-vegetated	5-10	5	1.465	0.41958	-0.0421678	-0.000617759	-0.00308879
	Non-vegetated	10-15	5	1.605	0.928899	0.16156	0.00259303	0.0129652
	Non-vegetated	15-20	5	1.63	2.63816	0.804407	0.0131118	0.0655592
	Non-vegetated	20-25	5	1.42	2.02838	0.542202	0.00769927	0.0384964
	Non-vegetated	25-30	5	1.455	2.03839	0.546506	0.00795167	0.0397583
	Non-vegetated	30-35	5	1.265	1.14821	0.249285	0.00315346	0.0157673
	Non-vegetated	35-40	5	1.125	1.58791	0.425164	0.00478309	0.0239155
	Non-vegetated	40-45	5	0.825	0.909636	0.153854	0.0012693	0.0063465
	Non-vegetated	45-50	5	0.96	3.00777	0.963341	0.00924807	0.0462403	0.242326	0.538502	5385.02	0.00538502	53.8502
Q3	Non-vegetated	0-5	5	1.4	0.289559	-0.0941765	-0.00131847	-0.00659236
	Non-vegetated	5-10	5	1.4	0.609167	0.0336669	0.000471336	0.00235668
	Non-vegetated	10-15	5	1.24	1.07908	0.221633	0.00274825	0.0137413
	Non-vegetated	15-20	5	1.2	1.20831	0.273324	0.00327989	0.0163994
	Non-vegetated	20-25	5	1.08	0.768989	0.0975957	0.00105403	0.00527017
	Non-vegetated	25-30	5	1.12	1.73819	0.485276	0.00543509	0.0271755
	Non-vegetated	30-35	5	0.76	1.07924	0.221698	0.0016849	0.00842452
	Non-vegetated	35-40	5	0.6	1.32879	0.321516	0.00192909	0.00964547
	Non-vegetated	40-45	5	1.1	1.69858	0.469431	0.00516374	0.0258187
	Non-vegetated	45-50	5	0.78	0.809442	0.113777	0.00088746	0.0044373	0.106677	0.237059	2370.59	0.00237059	23.7059
Q4	Non-vegetated	0-5	5	2.0586	1.23915	0.285659	0.00588057	0.0294028
	Non-vegetated	5-10	5	2.26242	0.739381	0.0857522	0.00194008	0.00970038
	Non-vegetated	10-15	5	2.11975	2.12745	0.584802	0.0123963	0.0619816
	Non-vegetated	15-20	5	1.81401	1.79982	0.509927	0.00925014	0.0462507
	Non-vegetated	20-25	5	1.85478	2.32767	0.670899	0.0124437	0.0622184
	Non-vegetated	25-30	5	1.81401	1.99839	0.589357	0.010691	0.053455
	Non-vegetated	30-35	5	1.75287	2.57771	0.778416	0.0136446	0.0682229
	Non-vegetated	35-40	5	1.58981	2.42858	0.71429	0.0113558	0.0567792
	Non-vegetated	40-45	5	1.46752	1.76841	0.497365	0.0072989	0.0364945
	Non-vegetated	45-50	5	1.52866	0.66883	0.057532	0.00087947	0.00439735	0.428903	0.953118	9531.18	0.00953118	95.3118
Q5	Non-vegetated	0-5	5	1.87516	0.669097	0.0576389	0.00108082	0.0054041
	Non-vegetated	5-10	5	1.97707	0.898626	0.14945	0.00295474	0.0147737
	Non-vegetated	10-15	5	1.87516	0.998857	0.189543	0.00355423	0.0177712
	Non-vegetated	15-20	5	1.87516	0.798882	0.109553	0.00205429	0.0102714
	Non-vegetated	20-25	5	2.07898	1.37829	0.341315	0.00709587	0.0354793
	Non-vegetated	25-30	5	1.91592	1.55798	0.413191	0.00791643	0.0395822
	Non-vegetated	30-35	5	1.87516	1.84778	0.529111	0.00992167	0.0496083
	Non-vegetated	35-40	5	1.81401	1.52828	0.401314	0.00727988	0.0363994
	Non-vegetated	40-45	5	1.40637	2.04754	0.550443	0.00774127	0.0387063
	Non-vegetated	45-50	5	1.32484	1.04897	0.209588	0.00277671	0.0138836	0.26188	0.581955	5819.55	0.00581955	58.1955

## Sheet: T ciliatum
Core	T.ciliatum	Depth	Section (cm)	B. density	% Organic matter	% Corg (gC per 100g sediment	C.density (gC per cm3)	C. density of section (gC per cm2)	C. stock in 50cm core (gC per cm2)	Equivalent C. stock in 100cm core (gC per cm2)	Equivalent C. stock in 100cm core (gC per m2)	Equivalent C. stock in 100cm core (MgC per m2)	Equivalent C. stock in 100cm core (MgC per ha)
Q1	Vegetated	0-5	5	0.94	3.21542	1.05263	0.0197895	0.0989473
	Vegetated	5-10	5	1.2	2.61993	0.796569	0.0191177	0.0955883
	Vegetated	10-15	5	1.42	3.46193	1.15863	0.0329051	0.164525
	Vegetated	15-20	5	1.42	2.21276	0.621485	0.0176502	0.0882509
	Vegetated	20-25	5	1.48	2.56344	0.772281	0.0228595	0.114298
	Vegetated	25-30	5	1.52	2.7047	0.833022	0.0253239	0.126619
	Vegetated	30-35	5	1.58	8.50979	3.32921	0.105203	0.526015
	Vegetated	35-40	5	1.5	3.55136	1.19709	0.0359126	0.179563
	Vegetated	40-45	5	1.7	3.41843	1.13993	0.0387575	0.193787
	Vegetated	45-50	5	1.58	3.10869	1.00673	0.0318128	0.159064	1.74666	3.49332	34933.2	0.0349332	349.332
Q2	Vegetated	0-5	5	1.72	1.87981	0.478317	0.0164541	0.0822706
	Vegetated	5-10	5	1.8	1.53968	0.332064	0.0119543	0.0597716
	Vegetated	10-15	5	1.72	1.67957	0.392217	0.0134923	0.0674613
	Vegetated	15-20	5	1.62	1.82826	0.45615	0.0147793	0.0738963
	Vegetated	20-25	5	1.52	1.74929	0.422194	0.0128347	0.0641735
	Vegetated	25-30	5	1.7	2.01919	0.538253	0.0183006	0.091503
	Vegetated	30-35	5	1.52	1.7583	0.42607	0.0129525	0.0647626
	Vegetated	35-40	5	1.52	1.58976	0.353598	0.0107494	0.0537468
	Vegetated	40-45	5	1.32	2.18797	0.610827	0.0161258	0.0806291
	Vegetated	45-50	5	1.58	1.47927	0.306086	0.00967233	0.0483617	0.686576	1.37315	13731.5	0.0137315	137.315
Q3	Vegetated	0-5	5	1.64	3.90122	1.34752	0.0441988	0.220994
	Vegetated	5-10	5	1.74	3.33753	1.10514	0.0384587	0.192294
	Vegetated	10-15	5	1.58	5.30029	1.94912	0.0615923	0.307962
	Vegetated	15-20	5	1.7	4.56823	1.63434	0.0555676	0.277838
	Vegetated	20-25	5	1.66	5.22208	1.91549	0.0635944	0.317972
	Vegetated	25-30	5	1.72	4.12645	1.44437	0.0496865	0.248432
	Vegetated	30-35	5	1.66	3.97068	1.37739	0.0457294	0.228647
	Vegetated	35-40	5	1.72	3.30943	1.09306	0.0376011	0.188006
	Vegetated	40-45	5	1.54	3.0597	0.985669	0.0303586	0.151793
	Vegetated	45-50	5	1.48	3.58205	1.21028	0.0358243	0.179122	2.31306	4.62612	46261.2	0.0462612	462.612
Q4	Vegetated	0-5	5	1.245	3.24794	1.06661	0.0265587	0.132794
	Vegetated	5-10	5	1.58	4.72554	1.70198	0.0537826	0.268913
	Vegetated	10-15	5	1.46	2.83746	0.890107	0.0259911	0.129956
	Vegetated	15-20	5	1.49	3.97729	1.38023	0.041131	0.205655
	Vegetated	20-25	5	1.625	3.73709	1.27695	0.0415008	0.207504
	Vegetated	25-30	5	1.52	4.51688	1.61226	0.0490127	0.245063
	Vegetated	30-35	5	1.425	3.55751	1.19973	0.0341923	0.170961
	Vegetated	35-40	5	1.385	4.12185	1.4424	0.0399544	0.199772
	Vegetated	40-45	5	1.315	4.68619	1.68506	0.0443171	0.221586
	Vegetated	45-50	5	1.16	2.32602	0.670187	0.0155483	0.0777417	1.85995	3.71989	37198.9	0.0371989	371.989
Q5	Vegetated	0-5	5	1.19	2.43951	0.71899	0.017112	0.0855598
	Vegetated	5-10	5	1.525	3.19878	1.04548	0.0318871	0.159435
	Vegetated	10-15	5	1.43	3.83806	1.32036	0.0377624	0.188812
	Vegetated	15-20	5	1.66	3.02637	0.971338	0.0322484	0.161242
	Vegetated	20-25	5	1.565	3.19908	1.0456	0.0327274	0.163637
	Vegetated	25-30	5	1.425	3.91886	1.35511	0.0386206	0.193103
	Vegetated	30-35	5	1.42	3.29934	1.08872	0.0309195	0.154598
	Vegetated	35-40	5	1.34	4.2077	1.47931	0.0396455	0.198228
	Vegetated	40-45	5	1.18	2.26897	0.645657	0.0152375	0.0761876
	Vegetated	45-50	5	1.2	3.61871	1.22605	0.0294251	0.147126	1.52793	3.05586	30558.6	0.0305586	305.586
Q6	Vegetated	0-5	5	1.245	1.98945	0.525465	0.0130841	0.0654204
	Vegetated	5-10	5	1.58	3.63736	1.23407	0.0389965	0.194982
	Vegetated	10-15	5	1.46	3.20838	1.0496	0.0306484	0.153242
	Vegetated	15-20	5	1.49	3.82721	1.3157	0.0392079	0.196039
	Vegetated	20-25	5	1.625	1.52867	0.327328	0.0106382	0.0531908
	Vegetated	25-30	5	1.52	2.40833	0.705581	0.0214497	0.107248
	Vegetated	30-35	5	1.425	3.22808	1.05807	0.0301551	0.150776
	Vegetated	35-40	5	1.385	2.26909	0.64571	0.0178862	0.0894308
	Vegetated	40-45	5	1.315	2.98855	0.955079	0.0251186	0.125593
	Vegetated	45-50	5	1.16	1.6795	0.392187	0.00909873	0.0454937	1.18142	2.36283	23628.3	0.0236283	236.283
Q7	Vegetated	0-5	5	1.19	4.02961	1.40273	0.033385	0.166925
	Vegetated	5-10	5	1.525	1.92918	0.499549	0.0152363	0.0761813
	Vegetated	10-15	5	1.43	2.96617	0.945454	0.02704	0.1352
	Vegetated	15-20	5	1.66	3.21272	1.05147	0.0349089	0.174544
	Vegetated	20-25	5	1.565	3.45928	1.15749	0.0362294	0.181147
	Vegetated	25-30	5	1.425	3.44788	1.15259	0.0328488	0.164244
	Vegetated	30-35	5	1.42	3.96806	1.37627	0.0390859	0.19543
	Vegetated	35-40	5	1.34	1.90885	0.490808	0.0131536	0.0657682
	Vegetated	40-45	5	1.18	1.80802	0.447448	0.0105598	0.0527988
	Vegetated	45-50	5	1.2	6.01793	2.25771	0.054185	0.270925	1.48316	2.96633	29663.3	0.0296633	296.633
Q8	Vegetated	0-5	5	1.16178	3.21542	1.05263	0.0244586	0.122293
	Vegetated	5-10	5	1.12102	2.61993	0.796569	0.0178594	0.0892969
	Vegetated	10-15	5	1.40637	3.46193	1.15863	0.0325892	0.162946
	Vegetated	15-20	5	1.42675	2.21276	0.621485	0.0177341	0.0886705
	Vegetated	20-25	5	1.34522	2.56344	0.772281	0.0207778	0.103889
	Vegetated	25-30	5	1.34522	2.7047	0.833022	0.022412	0.11206
	Vegetated	30-35	5	1.26369	8.50979	3.32921	0.084142	0.42071
	Vegetated	35-40	5	1.32484	3.55136	1.19709	0.0317189	0.158595
	Vegetated	40-45	5	1.46752	3.41843	1.13993	0.0334572	0.167286	1.8362	3.67241	36724.1	0.0367241	367.241
	Vegetated	45-50	5	1.38599	3.10869	1.00673	0.0279064	0.139532
Q9	Vegetated	0-5	5	1.295	4.35739	1.54368	0.0399812	0.199906
	Vegetated	5-10	5	1.435	1.83904	0.460787	0.0132246	0.0661229
	Vegetated	10-15	5	1.43	3.05723	0.984608	0.0281598	0.140799
	Vegetated	15-20	5	1.5	2.07875	0.563864	0.0169159	0.0845796
	Vegetated	20-25	5	1.345	3.03801	0.976345	0.0262637	0.131318
	Vegetated	25-30	5	1.315	3.13592	1.01844	0.0267851	0.133925
	Vegetated	30-35	5	1.23	3.05633	0.984223	0.0242119	0.121059
	Vegetated	35-40	5	1.205	3.9984	1.38931	0.0334824	0.167412
	Vegetated	40-45	5	1.125	3.65927	1.24349	0.0279784	0.139892
	Vegetated	45-50	5	0.915	3.79733	1.30285	0.0238422	0.119211	1.30423	2.60845	26084.5	0.0260845	260.845
Q10	Vegetated	0-5	5	1.245	2.04938	0.551234	0.0137257	0.0686287
	Vegetated	5-10	5	1.34	1.97901	0.520976	0.0139622	0.0698108
	Vegetated	10-15	5	1.36	1.80872	0.447749	0.0121788	0.0608939
	Vegetated	15-20	5	1.315	2.98672	0.954289	0.0250978	0.125489
	Vegetated	20-25	5	1.28	2.92737	0.928771	0.0237765	0.118883
	Vegetated	25-30	5	1.18	1.90982	0.491222	0.0115928	0.0579642
	Vegetated	30-35	5	1.305	2.12936	0.585625	0.0152848	0.076424
	Vegetated	35-40	5	1.275	2.47802	0.735548	0.0187565	0.0937823
	Vegetated	40-45	5	1.045	4.33926	1.53588	0.0320999	0.1605
	Vegetated	45-50	5	1.07	2.08791	0.567802	0.012151	0.0607548	0.89313	1.78626	17862.6	0.0178626	178.626
Q11	Vegetated	0-5	5	1.035	1.88942	0.48245	0.00998671	0.0499336
	Vegetated	5-10	5	1.1	1.63918	0.374849	0.00824668	0.0412334
	Vegetated	10-15	5	1.04	2.67785	0.821474	0.0170867	0.0854333
	Vegetated	15-20	5	1.375	1.52955	0.327707	0.00901193	0.0450597
	Vegetated	20-25	5	1.235	1.12965	0.15575	0.00384704	0.0192352
	Vegetated	25-30	5	1.095	3.41966	1.14046	0.024976	0.12488
	Vegetated	30-35	5	1.17	2.41781	0.709657	0.016606	0.0830299
	Vegetated	35-40	5	1.07	2.22842	0.628222	0.0134439	0.0672197
	Vegetated	40-45	5	1.105	3.73705	1.27693	0.0282202	0.141101
	Vegetated	45-50	5	1.095	2.27867	0.649826	0.0142312	0.0711559	0.728282	1.45656	14565.6	0.0145656	145.656
Q12	Vegetated	0-5	5	1.065	2.55747	0.769711	0.0163948	0.0819742
	Vegetated	5-10	5	1.17	2.23798	0.632332	0.0147966	0.0739829
	Vegetated	10-15	5	1.27	1.83874	0.46066	0.0117008	0.0585038
	Vegetated	15-20	5	1.22	1.60871	0.361747	0.00882662	0.0441331
	Vegetated	20-25	5	1.33	2.46878	0.731576	0.0194599	0.0972996
	Vegetated	25-30	5	1.35	2.6181	0.795783	0.0214861	0.107431
	Vegetated	30-35	5	1.205	2.37928	0.69309	0.0167035	0.0835173
	Vegetated	35-40	5	1.105	3.6589	1.24333	0.0274775	0.137388
	Vegetated	40-45	5	1	1.83904	0.460788	0.00921575	0.0460788
	Vegetated	45-50	5	1.015	1.70953	0.405099	0.00822351	0.0411175	0.771425	1.54285	15428.5	0.0154285	154.285
Q13	Vegetated	0-5	5	1.155	3.62821	1.23013	0.0284161	0.14208
	Vegetated	5-10	5	1.15	3.229	1.05847	0.0243448	0.121724
	Vegetated	10-15	5	1.18	1.36915	0.258735	0.00610614	0.0305307
	Vegetated	15-20	5	1.15	1.95826	0.51205	0.0117771	0.0588857
	Vegetated	20-25	5	0.98	3.79885	1.30351	0.0255487	0.127744
	Vegetated	25-30	5	1.18	2.45881	0.727289	0.017164	0.0858201
	Vegetated	30-35	5	1.325	4.37469	1.55112	0.0411046	0.205523
	Vegetated	35-40	5	1.285	4.38614	1.55604	0.0399903	0.199951
	Vegetated	40-45	5	1.01	3.45936	1.15752	0.023382	0.11691
	Vegetated	45-50	5	0.98	4.25617	1.50015	0.029403	0.147015	1.23618	2.47237	24723.7	0.0247237	247.237
Q14	Vegetated	0-5	5	1.265	2.82859	0.886294	0.0224232	0.112116
	Vegetated	5-10	5	1.255	1.52814	0.3271	0.00821022	0.0410511
	Vegetated	10-15	5	1.445	1.34918	0.250148	0.00722927	0.0361463
	Vegetated	15-20	5	1.51	0.959412	0.0825473	0.00249293	0.0124646
	Vegetated	20-25	5	1.49	1.64967	0.379358	0.0113049	0.0565244
	Vegetated	25-30	5	1.425	2.12978	0.585807	0.0166955	0.0834775
	Vegetated	30-35	5	1.42	0.909518	0.0610929	0.00173504	0.00867519
	Vegetated	35-40	5	1.455	1.4389	0.288726	0.00840192	0.0420096
	Vegetated	40-45	5	1.34	2.8885	0.912055	0.0244431	0.122215
	Vegetated	45-50	5	1.185	1.79933	0.443711	0.010516	0.0525798	0.56726	1.13452	11345.2	0.0113452	113.452
Q15	Vegetated	0-5	5	1.065	2.57871	0.778846	0.0165894	0.0829471
	Vegetated	5-10	5	1.21	1.78903	0.439283	0.0106307	0.0531533
	Vegetated	10-15	5	1.195	1.42938	0.284633	0.00680272	0.0340136
	Vegetated	15-20	5	1.28	1.51943	0.323356	0.00827791	0.0413896
	Vegetated	20-25	5	1.26	2.07947	0.564173	0.0142172	0.0710858
	Vegetated	25-30	5	1.435	1.61932	0.366308	0.010513	0.0525652
	Vegetated	30-35	5	1.4	3.28671	1.08329	0.030332	0.15166
	Vegetated	35-40	5	1.27	2.15935	0.598522	0.0152025	0.0760123
	Vegetated	40-45	5	1.06	3.70887	1.26481	0.026814	0.13407
	Vegetated	45-50	5	0.93	2.64916	0.809138	0.01505	0.0752498	0.772147	1.54429	15442.9	0.0154429	154.429
Q1	Non-vegetated	0-5	5	1.22	1.23901	0.285604	0.00348436	0.0174218
	Non-vegetated	5-10	5	1.52	1.58936	0.425746	0.00647133	0.0323567
	Non-vegetated	10-15	5	1.44	1.32947	0.321787	0.00463374	0.0231687
	Non-vegetated	15-20	5	1.4	1.3296	0.32184	0.00450577	0.0225288
	Non-vegetated	20-25	5	1.18	1.60936	0.433743	0.00511816	0.0255908
	Non-vegetated	25-30	5	1.28	1.75947	0.493789	0.0063205	0.0316025
	Non-vegetated	30-35	5	1.22	1.51924	0.397696	0.00485189	0.0242595
	Non-vegetated	35-40	5	1.22	1.429	0.3616	0.00441152	0.0220576
	Non-vegetated	40-45	5	1.16	1.60968	0.433871	0.00503291	0.0251645
	Non-vegetated	45-50	5	1.2	1.78785	0.505142	0.0060617	0.0303085	0.254459	0.565465	5654.65	0.00565465	56.5465
Q2	Non-vegetated	0-5	5	1.10064	1.88906	0.545622	0.00600532	0.0300266
	Non-vegetated	5-10	5	1.46752	1.89848	0.549392	0.00806242	0.0403121
	Non-vegetated	10-15	5	1.42675	1.71914	0.477656	0.00681497	0.0340748
	Non-vegetated	15-20	5	1.61019	1.94903	0.56961	0.00917181	0.0458591
	Non-vegetated	20-25	5	1.58981	1.58968	0.425873	0.00677056	0.0338528
	Non-vegetated	25-30	5	1.42675	1.92904	0.561614	0.00801284	0.0400642
	Non-vegetated	30-35	5	1.30446	1.70915	0.473658	0.00617867	0.0308934
	Non-vegetated	35-40	5	1.24331	1.13897	0.24559	0.00305345	0.0152672
	Non-vegetated	40-45	5	1.28408	1.81982	0.517927	0.00665058	0.0332529
	Non-vegetated	45-50	5	1.24331	1.06925	0.217701	0.0027067	0.0135335	0.317137	0.704748	7047.48	0.00704748	70.4748
Q3	Non-vegetated	0-5	5	1.48	1.31881	0.317525	0.00469937	0.0234969
	Non-vegetated	5-10	5	1.245	1.5	0.39	0.0048555	0.0242775
	Non-vegetated	10-15	5	1.58	1.44942	0.369768	0.00584234	0.0292117
	Non-vegetated	15-20	5	1.46	1.66917	0.457666	0.00668193	0.0334096
	Non-vegetated	20-25	5	1.49	1.77893	0.501573	0.00747344	0.0373672
	Non-vegetated	25-30	5	1.125	1.56937	0.417749	0.00469968	0.0234984
	Non-vegetated	30-35	5	1.52	1.80891	0.513566	0.0078062	0.039031
	Non-vegetated	35-40	5	1.425	1.74895	0.48958	0.00697652	0.0348826
	Non-vegetated	40-45	5	1.385	1.7982	0.509281	0.00705354	0.0352677
	Non-vegetated	45-50	5	1.315	2.31838	0.717351	0.00943316	0.0471658
Q4	Non-vegetated	0-5	5	1.16	1.52954	0.401816	0.00466107	0.0233054	0.327417	0.727593	7275.93	0.00727593	72.7593
	Non-vegetated	5-10	5	0.64	1.75965	0.493859	0.0031607	0.0158035
	Non-vegetated	10-15	5	1.08	1.42886	0.361543	0.00390466	0.0195233
	Non-vegetated	15-20	5	1.18	0.74985	0.08994	0.00106129	0.00530646
	Non-vegetated	20-25	5	1.44	0.729489	0.0817957	0.00117786	0.00588929
	Non-vegetated	25-30	5	1.16	0.779688	0.101875	0.00118175	0.00590876
	Non-vegetated	30-35	5	1.3	1.02897	0.201588	0.00262065	0.0131032
	Non-vegetated	35-40	5	1.26	1.55906	0.413626	0.00521169	0.0260584
	Non-vegetated	40-45	5	1.16	1.42986	0.361943	0.00419854	0.0209927
	Non-vegetated	45-50	5	1.22	1.55891	0.413564	0.00504547	0.0252274
Q5	Non-vegetated	0-5	5	1.32	2.39784	0.749137	0.00988861	0.049443	0.187256	0.416125	4161.25	0.00416125	41.6125
	Non-vegetated	5-10	5	1.10064	2.0196	0.597838	0.00658003	0.0329002
	Non-vegetated	10-15	5	1.46752	1.97782	0.58113	0.00852817	0.0426409
	Non-vegetated	15-20	5	1.42675	1.5197	0.397878	0.00567674	0.0283837
	Non-vegetated	20-25	5	1.11019	1.40901	0.353605	0.0039257	0.0196285
	Non-vegetated	25-30	5	1.18981	1.70932	0.473727	0.00563644	0.0281822
	Non-vegetated	30-35	5	1.42675	1.35918	0.333674	0.0047607	0.0238035
	Non-vegetated	35-40	5	1.30446	1.29948	0.309792	0.00404111	0.0202055
	Non-vegetated	40-45	5	1.24331	1.65934	0.453735	0.00564134	0.0282067
	Non-vegetated	45-50	5	1.08408	1.84852	0.529408	0.00573919	0.028696	0.30209	0.671311	6713.11	0.00671311	67.1311

## Sheet: S. isoetifolium
S.isoetifolium
Core	treat	Depth	Section (cm)	Bd	% Org matter	% Corg (gC per 100g sediment	C.density (gC per cm3)	C. density of section (gC per cm2)	C. stock in 50cm core (gC per cm2)	Equivalent C. stock in 100cm core (gC per cm2)	Equivalent C. stock in 100cm core (gC per m2)	Equivalent C. stock in 100cm core (MgC per m2)	Equivalent C. stock in 100cm core (MgC per ha)
Q1	veg,	0-5	5	1.22293	2.47765	0.735391	0.00899331	0.0449666
	veg,	5-10	5	1.50828	9.98203	3.96227	0.0597622	0.298811
	veg,	10-15	5	1.36561	3.93361	1.36145	0.018592	0.0929602
	veg,	15-20	5	1.32484	3.40734	1.13516	0.015039	0.0751951
	veg,	20-25	5	1.32484	3.27696	1.07909	0.0142962	0.0714812
	veg,	25-30	5	1.24331	4.26	1.5018	0.0186721	0.0933603
	veg,	30-35	5	1.24331	3.46715	1.16087	0.0144333	0.0721664
	veg,	35-40	5	1.12102	3.64781	1.23856	0.0138845	0.0694224
	veg,	40-45	5	1.24331	3.46715	1.16087	0.0144333	0.0721664
	veg,	45-50	5	1.40637	3.07662	0.992945	0.0139645	0.0698224	0.960352	1.9207	19207	0.019207	192.07
Q2	veg,	0-5	5	1.22293	3.06967	0.989957	0.0121065	0.000148054
	veg,	5-10	5	1.02	5.58592	2.07195	0.0211338	0.105669
	veg,	10-15	5	1	3.82653	1.31541	0.0131541	0.0657704
	veg,	15-20	5	1.22	2.49793	0.74411	0.00907814	0.0453907
	veg,	20-25	5	1.34	2.33849	0.675551	0.00905238	0.0452619
	veg,	25-30	5	1.36	2.43799	0.718336	0.00976937	0.0488468
	veg,	30-35	5	1.34	2.74748	0.851416	0.011409	0.0570449
	veg,	35-40	5	1.22	2.85812	0.898992	0.0109677	0.0548385
	veg,	40-45	5	1.34	2.13893	0.58974	0.00790251	0.0395126
	veg,	45-50	5	0.88	2.12874	0.585358	0.00515115	0.0257558	0.488239	0.976478	9764.78	0.00976478	97.6478
Q3	veg,	0-5	5	1.22	2.38933	0.697412	0.00850843	0.0425421
	veg,	5-10	5	1.44	3.84548	1.32356	0.0190592	0.0952961
	veg,	10-15	5	1.5	4.00961	1.39413	0.020912	0.10456
	veg,	15-20	5	1.62	3.52681	1.18653	0.0192218	0.0961088
	veg,	20-25	5	1.66	2.80749	0.877221	0.0145619	0.0728093
	veg,	25-30	5	1.6	3.0277	0.971911	0.0155506	0.0777529
	veg,	30-35	5	1.66	2.14897	0.594057	0.00986135	0.0493067
	veg,	35-40	5	1.44	3.39729	1.13083	0.016284	0.0814201
	veg,	40-45	5	1.42	3.96802	1.37625	0.0195427	0.0977137
	veg,	45-50	5	1.5	3.64648	1.23799	0.0185698	0.092849	0.810359	1.62072	16207.2	0.0162072	162.072
Q4	veg,	0-5	5	1.26	2.77832	0.864678	0.0108949	0.0544747
	veg,	5-10	5	1.06	4.96747	1.80601	0.0191437	0.0957186
	veg,	10-15	5	1.38	3.93476	1.36195	0.0187949	0.0939743
	veg,	15-20	5	1.38	3.21779	1.05365	0.0145404	0.0727018
	veg,	20-25	5	1.6	2.06938	0.559833	0.00895733	0.0447867
	veg,	25-30	5	1.46	3.0167	0.967181	0.0141208	0.0706042
	veg,	30-35	5	1.46	2.03918	0.546847	0.00798397	0.0399199
	veg,	35-40	5	1.62	2.19893	0.61554	0.00997175	0.0498587
	veg,	40-45	5	1.46	2.42835	0.71419	0.0104272	0.0521359
	veg,	45-50	5	1.66	2.36835	0.68839	0.0114273	0.0571364	0.631311	1.26262	12626.2	0.0126262	126.262
Q5	veg,	0-5	5	1.40637	4.18733	1.47055	0.0206814	0.103407
	veg,	5-10	5	1.56943	5.0116	1.82499	0.0286418	0.143209
	veg,	10-15	5	1.50828	4.8239	1.74428	0.0263086	0.131543
	veg,	15-20	5	1.32484	5.98576	2.24388	0.0297278	0.148639
	veg,	20-25	5	1.61019	4.66535	1.6761	0.0269884	0.134942
	veg,	25-30	5	1.69172	12.5037	5.04661	0.0853745	0.426873
	veg,	30-35	5	1.65096	5.18117	1.8979	0.0313335	0.156668
	veg,	35-40	5	1.20255	4.89132	1.77327	0.0213244	0.106622
	veg,	40-45	5	1.16178	4.54	1.6222	0.0188465	0.0942323
	veg,	45-50	5	1.05987	4.708	1.69444	0.0179589	0.0897945	1.53593	3.07186	30718.6	0.0307186	307.186
Q6	veg,	0-5	5	1.14	4.00638	1.39274	0.0158773	0.0793864
	veg,	5-10	5	1.4	2.42897	0.714457	0.0100024	0.050012
	veg,	10-15	5	1.34	2.53949	0.761981	0.0102105	0.0510527
	veg,	15-20	5	1.4	4.53678	1.62082	0.0226914	0.113457
	veg,	20-25	5	1.4	2.89772	0.91602	0.0128243	0.0641214
	veg,	25-30	5	1.58	5.4184	1.99991	0.0315986	0.157993
	veg,	30-35	5	1.52	2.62972	0.80078	0.0121718	0.0608592
	veg,	35-40	5	1.12	3.37816	1.12261	0.0125732	0.0628661
	veg,	40-45	5	1.08	2.41864	0.710015	0.00766816	0.0383408
	veg,	45-50	5	1	2.64709	0.808249	0.00808249	0.0404124	0.718501	1.437	14370	0.01437	143.7
Q7	veg,	0-5	5	0.96	3.6479	1.2386	0.0118905	0.0594527
	veg,	5-10	5	1.54	2.91942	0.925351	0.0142504	0.071252
	veg,	10-15	5	1.88	2.67732	0.821248	0.0154395	0.0771973
	veg,	15-20	5	1.8	2.85632	0.898218	0.0161679	0.0808396
	veg,	20-25	5	1.84	3.02908	0.972504	0.0178941	0.0894704
	veg,	25-30	5	1.98	3.18872	1.04115	0.0206148	0.103074
	veg,	30-35	5	1.66	6.04824	2.27074	0.0376943	0.188472
	veg,	35-40	5	1.58	2.00819	0.533522	0.00842964	0.0421482
	veg,	40-45	5	1.38	2.527	0.75661	0.0104412	0.0522061
	veg,	45-50	5	1.38	2.51799	0.752736	0.0103878	0.0519388	0.81605	1.6321	16321	0.016321	163.21
Q8	veg,	0-5	5	1.36561	2.13826	0.589451	0.00804957	0.0402479
	veg,	5-10	5	1.4879	1.99132	0.526268	0.00783033	0.0391516
	veg,	10-15	5	1.89554	14.6599	5.97378	0.113235	0.566177
	veg,	15-20	5	1.32484	2.13153	0.586558	0.00777096	0.0388548
	veg,	20-25	5	1.95669	12.0531	4.85284	0.0949549	0.474774
	veg,	25-30	5	1.7121	4.45529	1.58577	0.0271501	0.13575
	veg,	30-35	5	1.44713	4.45502	1.58566	0.0229466	0.114733
	veg,	35-40	5	1.54904	5.07417	1.85189	0.0286867	0.143433
	veg,	40-45	5	1.63057	3.81739	1.31148	0.0213846	0.106923	1.89014	3.78028	37802.8	0.0378028	378.028
	veg,	45-50	5	1.83439	5.28463	1.94239	0.0356311	0.178155
Q9	veg,	0-5	5	1.28	2.65842	0.813121	0.0104079	0.0520397
	veg,	5-10	5	1.46	2.11911	0.581217	0.00848577	0.0424289
	veg,	10-15	5	1.36	1.67861	0.391802	0.00532851	0.0266426
	veg,	15-20	5	1.76	1.7594	0.426542	0.00750714	0.0375357
	veg,	20-25	5	1.52	3.9392	1.36386	0.0207306	0.103653
	veg,	25-30	5	1.52	2.88944	0.912459	0.0138694	0.0693469
	veg,	30-35	5	1.88	1.77733	0.434252	0.00816394	0.0408197
	veg,	35-40	5	1.6	1.82983	0.456827	0.00730923	0.0365462
	veg,	40-45	5	1.52	1.9988	0.529484	0.00804816	0.0402408
	veg,	45-50	5	1.64	2.93882	0.933693	0.0153126	0.0765628	0.525816	1.05163	10516.3	0.0105163	105.163
Q10	veg,	0-5	5	1.16	2.28886	0.65421	0.00758883	0.0379442
	veg,	5-10	5	1.28	3.42836	1.14419	0.0146457	0.0732285
	veg,	10-15	5	1.44	3.2887	1.08414	0.0156116	0.0780582
	veg,	15-20	5	1.7	2.05791	0.554901	0.00943332	0.0471666
	veg,	20-25	5	1.62	2.28887	0.654214	0.0105983	0.0529913
	veg,	25-30	5	1.82	2.60868	0.791732	0.0144095	0.0720476
	veg,	30-35	5	1.68	1.83932	0.460908	0.00774325	0.0387162
	veg,	35-40	5	1.5	2.01836	0.537895	0.00806842	0.0403421
	veg,	40-45	5	1.48	3.39728	1.13083	0.0167363	0.0836814
	veg,	45-50	5	1.64	1.56796	0.344223	0.00564525	0.0282263	0.552402	1.1048	11048	0.011048	110.48
Q11	veg,	0-5	5	1.04	4.08918	1.42835	0.0148548	0.0742741
	veg,	5-10	5	1.16	2.60784	0.791371	0.00917991	0.0458995
	veg,	10-15	5	1.3	3.06935	0.98982	0.0128677	0.0643383
	veg,	15-20	5	1.64	2.31907	0.6672	0.0109421	0.0547104
	veg,	20-25	5	1.5	3.36899	1.11867	0.01678	0.0838999
	veg,	25-30	5	1.7	2.26933	0.645812	0.0109788	0.054894
	veg,	30-35	5	1.96	2.07751	0.563329	0.0110413	0.0552063
	veg,	35-40	5	1.66	2.5179	0.752697	0.0124948	0.0624739
	veg,	40-45	5	1.52	3.89765	1.34599	0.020459	0.102295
	veg,	45-50	5	1.8	2.41783	0.709667	0.012774	0.06387	0.661862	1.32372	13237.2	0.0132372	132.372
Q12	veg,	0-5	5	1.1	3.52612	1.18623	0.0130485	0.0652427
	veg,	5-10	5	1.06	2.52899	0.757466	0.00802914	0.0401457
	veg,	10-15	5	1.2	3.2381	1.06238	0.0127486	0.063743
	veg,	15-20	5	1.38	4.00717	1.39308	0.0192245	0.0961227
	veg,	20-25	5	1.56	4.45641	1.58626	0.0247456	0.123728
	veg,	25-30	5	1.52	3.0663	0.988509	0.0150253	0.0751267
	veg,	30-35	5	1.24	3.6488	1.23898	0.0153634	0.076817
	veg,	35-40	5	1.32	3.87844	1.33773	0.017658	0.0882901
	veg,	40-45	5	1.2	3.46653	1.16061	0.0139273	0.0696365
	veg,	45-50	5	1.4	3.27908	1.08	0.0151201	0.0756003	0.774453	1.54891	15489.1	0.0154891	154.891
Q13	veg,	0-5	5	1.14	2.19852	0.615364	0.00701515	0.0350757
	veg,	5-10	5	1.42	1.75772	0.42582	0.00604664	0.0302332
	veg,	10-15	5	1.4	1.63965	0.375049	0.00525069	0.0262535
	veg,	15-20	5	1.26	3.88651	1.3412	0.0168991	0.0844956
	veg,	20-25	5	1.28	4.56729	1.63393	0.0209144	0.104572
	veg,	25-30	5	1.48	3.77773	1.29442	0.0191575	0.0957874
	veg,	30-35	5	1.52	5.12628	1.8743	0.0284894	0.142447
	veg,	35-40	5	1.58	1.90789	0.490393	0.0077482	0.038741
	veg,	40-45	5	1.32	1.92848	0.499246	0.00659005	0.0329503
	veg,	45-50	5	1.62	1.37847	0.262742	0.00425642	0.0212821	0.611837	1.22367	12236.7	0.0122367	122.367
Q14	veg,	0-5	5	1.24	2.51775	0.752632	0.00933264	0.0466632
	veg,	5-10	5	1.52	3.15781	1.02786	0.0156234	0.0781172
	veg,	10-15	5	1.66	2.21878	0.624075	0.0103597	0.0517983
	veg,	15-20	5	1.54	1.31933	0.237312	0.0036546	0.018273
	veg,	20-25	5	1.54	2.52899	0.757466	0.011665	0.0583249
	veg,	25-30	5	1.64	3.75771	1.28582	0.0210874	0.105437
	veg,	30-35	5	1.48	4.22535	1.4869	0.0220061	0.110031
	veg,	35-40	5	1.62	2.02861	0.542302	0.0087853	0.0439265
	veg,	40-45	5	1.48	1.86849	0.473451	0.00700707	0.0350354
	veg,	45-50	5	1.7	1.76548	0.429156	0.00729566	0.0364783	0.584084	1.16817	11681.7	0.0116817	116.817
Q15	veg,	0-5	5	1.16	1.80874	0.447758	0.005194	0.02597
	veg,	5-10	5	1.24	2.76945	0.860864	0.0106747	0.0533735
	veg,	10-15	5	1.34	2.3386	0.675598	0.00905301	0.0452651
	veg,	15-20	5	1.5	3.23707	1.06194	0.0159291	0.0796455
	veg,	20-25	5	1.62	2.27746	0.649308	0.0105188	0.0525939
	veg,	25-30	5	1.54	2.10841	0.576616	0.00887989	0.0443995
	veg,	30-35	5	1.48	2.49725	0.743818	0.0110085	0.0550425
	veg,	35-40	5	1.54	1.2595	0.211585	0.00325841	0.016292
	veg,	40-45	5	1.32	2.6487	0.808941	0.010678	0.0533901
	veg,	45-50	5	1.38	2.84886	0.89501	0.0123511	0.0617557	0.487728	0.975456	9754.56	0.00975456	97.5456
Q1	nonveg	0-5	5	1.38	1.69728	0.468912	0.00647099	0.0323549
	nonveg	5-10	5	1.46	0.83899	0.125596	0.0018337	0.00916851
	nonveg	10-15	5	1.72	0.53914	0.005656	9.72832e-05	0.000486416
	nonveg	15-20	5	1.72	0.46944	-0.022224	-0.000382253	-0.00191126
	nonveg	20-25	5	1.82	0.75954	0.093816	0.00170745	0.00853726
	nonveg	25-30	5	1.8	1.34811	0.329244	0.00592639	0.029632
	nonveg	30-35	5	1.78	0.78	0.102	0.0018156	0.009078
	nonveg	35-40	5	1.5	0.51948	-0.002208	-3.312e-05	-0.0001656
	nonveg	40-45	5	1.2	0.90964	0.153856	0.00184627	0.00923136
	nonveg	45-50	5	1.3	1.28	0.302	0.003926	0.01963	0.116042	0.25787	2578.7	0.0025787	25.787
Q2	nonveg	0-5	5	1.22293	0.81	0.114	0.00139414	0.0069707
	nonveg	5-10	5	1.50828	0.92833	0.161332	0.00243334	0.0121667
	nonveg	10-15	5	1.36561	1.38972	0.345888	0.00472346	0.0236173
	nonveg	15-20	5	1.32484	0.70915	0.07366	0.000975878	0.00487939
	nonveg	20-25	5	1.32484	1.18976	0.265904	0.0035228	0.017614
	nonveg	25-30	5	1.24331	1.13841	0.245364	0.00305064	0.0152532
	nonveg	30-35	5	1.12102	0.75909	0.093636	0.00104968	0.00524839
	nonveg	35-40	5	1.24331	0.76892	0.097568	0.00121307	0.00606537
	nonveg	40-45	5	1.40637	2.19824	0.615243	0.00865259	0.043263
	nonveg	45-50	5	1.22293	1.07849	0.221396	0.00270752	0.0135376	0.148616	0.330257	3302.57	0.00330257	33.0257
Q3	nonveg	0-5	5	1.38	0.56989	0.017956	0.000247793	0.00123896
	nonveg	5-10	5	1.40637	1.40859	0.353436	0.00497062	0.0248531
	nonveg	10-15	5	1.72	0.89892	0.149568	0.00257257	0.0128628
	nonveg	15-20	5	1.72	1.14885	0.24954	0.00429209	0.0214604
	nonveg	20-25	5	1.82	1.02979	0.201916	0.00367487	0.0183744
	nonveg	25-30	5	1.8	0.96	0.174	0.003132	0.01566
	nonveg	30-35	5	1.78	0.45963	-0.026148	-0.000465434	-0.00232717
	nonveg	35-40	5	1.5	1.34919	0.329676	0.00494514	0.0247257
	nonveg	40-45	5	0.9	1.32947	0.321788	0.00289609	0.0144805
	nonveg	45-50	5	1.3	1.17859	0.261436	0.00339867	0.0169933	0.144866	0.321925	3219.25	0.00321925	32.1925
Q4	nonveg	0-5	5	1.1414	0.45991	-0.026036	-0.000297175	-0.00148588
	nonveg	5-10	5	1.36561	1.07849	0.221396	0.0030234	0.015117
	nonveg	10-15	5	1.52866	1.39748	0.348992	0.00533491	0.0266745
	nonveg	15-20	5	1.69172	1.3292	0.32168	0.00544192	0.0272096
	nonveg	20-25	5	1.52866	2.34671	0.679085	0.0103809	0.0519046
	nonveg	25-30	5	1.61019	2.33	0.6719	0.0108189	0.0540944
	nonveg	30-35	5	1.75287	1.07935	0.22174	0.00388681	0.019434
	nonveg	35-40	5	1.61019	1.06829	0.217316	0.0034992	0.017496
	nonveg	40-45	5	1.44713	1.1291	0.24164	0.00349685	0.0174843
	nonveg	45-50	5	1.44713	1.41801	0.357204	0.00516922	0.0258461	0.244922	0.544271	5442.71	0.00544271	54.4271
Q5	nonveg	0-5	5	1.30446	1.65934	0.453736	0.0059188	0.029594
	nonveg	5-10	5	1.42675	0.50939	-0.006244	-8.90864e-05	-0.000445432
	nonveg	10-15	5	1.58981	1.1679	0.25716	0.00408835	0.0204418
	nonveg	15-20	5	1.42675	1.13863	0.245452	0.00350199	0.01751
	nonveg	20-25	5	1.44713	1.28974	0.305896	0.00442672	0.0221336
	nonveg	25-30	5	1.58981	0.9798	0.18192	0.00289218	0.0144609
	nonveg	30-35	5	1.7121	1.668	0.4572	0.00782773	0.0391386
	nonveg	35-40	5	1.32484	1.4894	0.38576	0.00511071	0.0255535
	nonveg	40-45	5	1.75287	1.40747	0.352988	0.00618741	0.030937
	nonveg	45-50	5	0.876433	1.58873	0.425492	0.00372915	0.0186458	0.21797	0.484377	4843.77	0.00484377	48.4377

## Sheet: Sediment carbon comparison
Species	Th	Core
		1	345.695			Species	Vegetated	C. interval	Un-vegetated	C. interval
		2	291.993			T. hemprichii	233.774	42.1187	51.7945	14.9439
		3	248.357			E. acoroides	295.741	63.5944	51.7927	25.1719
		4	190.407			T. ciliatum	252.101	53.2187	61.7048	11.2495
		5	162.965			S. isoetifolium	160.654	40.3396	33.3909	4.45109
		6	199.127
		7	206.952
		8	178.603
		9	140.54
		10	237.264
		11	350.509
		12	426.599
		13	164.472
		14	128.23
		15	234.896
		AVE	233.774
		STDEV	85.9581
		CONF	42.1187
Species	Ea	1	368.222
		2	274.543
		3	359.38
		4	186.516
		5	113.675
		6	167.868
		7	230.407
		8	309.808								Variation in sediment Corg between the vegetated and un-vegetated areas for the four seagrass species (means± 95% C.I.)
		9	314.671
		10	367.369
		11	595.575
		12	476.329
		13	188.316
		14	247.133
		15	236.306
		AVE	295.741
		STDEV	125.666
		CONF	63.5944
Species	Tc	Core
		1	349.332
		2	137.315
		3	462.612
		4	371.989
		5	305.586
		6	236.283
		7	296.633
		8	367.241
		9	260.845
		10	178.626
		11	145.656
		12	154.285
		13	247.237
		14	113.452
		15	154.429
		AVE	252.101
		STDEV	105.163
		CONF	53.2187
Species	si	Core
		1	192.07
		2	97.6478
		3	162.072
		4	126.262
		5	307.186
		6	143.7
		7	163.21
		8	378.028
		9	105.163
		10	110.48
		11	132.372
		12	154.891
		13	122.367
		14	116.817
		15	97.5456
		AVE	160.654
		STDEV	79.7131
		CONF	40.3396

## Sheet: % of total carbon
Species	Biomass			Species	Sediment carbon	Biomass carbon	Total carbon	% Sediment	% of Biomass
S. Isoetifolium				T. hemprichii	233.774	5.3	239.074	97.7831	2.21689
T. Hemprichii				E. acoroides	295.741	6.2	301.941	97.9466	2.05338
E. acoroides				T. ciliatum	252.101	4.8	256.901	98.1316	1.86842
T. ciliatum				S. isoetifolium	160.654	7.1	167.754	95.7676	4.23238
				Average	235.568	5.85	241.418	97.4072	2.59277
				Stdev	48.7583	0.87892	48.308	0.954626	0.954626
				C.interval	24.3791	0.43946	24.154	0.477313	0.477313
Mean total Corg (± 95% C.I) in the sediment and the biomass associated with the four dominant seagrass species at Gazi Bay.

## Sheet: Biomass
T. hemprichii	Shoot.Den m-2	%C. Cover	Sht. Height (cm)	AGB g DW m-2	AGCorg g DWm-2	AGCorg MgC ha-1	Roots	Rhizome	Necromass	BGB (g DW)	BGB (g DW m-2)	BGCorg (g DW m-2)	BGCorg (Mg C ha-1)	T. B (g DW m-2)	T. Corg (Mg C ha-1)	% BGB
Th Q1	944	60	17.4	288.016	97.9254	0.979254	1.506	0.43	0.565	2.501	884.996	300.899	3.00899	1173.01	3.98824	75.4465
Th Q2	1184	70	23.4	332.32	112.989	1.12989	0.251	0.336	1.128	1.715	606.865	206.334	2.06334	939.185	3.19323	64.6161
Th Q3	1328	50	17.4	272.288	92.5779	0.925779	0.503	1.398	1.037	2.938	1039.63	353.475	3.53475	1311.92	4.46053	79.2451
Th Q4	880	40	23.7	303.36	103.142	1.03142	0.689	1.604	1.596	3.889	1376.15	467.891	4.67891	1679.51	5.71033	81.9376
Th Q5	1344	50	24.5	334.352	113.68	1.1368	0.447	0.654	1.867	2.968	1050.25	357.084	3.57084	1384.6	4.70764	75.8521
Th Q6	1008	70	13	160	54.4	0.544	2.416	2.292	0.837	5.545	706.369	240.166	2.40166	866.369	2.94566	81.5321
Th Q7	1258	80	14	106.4	36.176	0.36176	0.416	2.99	3.183	6.589	839.363	285.383	2.85383	945.763	3.21559	88.7498
Th Q8	824	55	14	140	47.6	0.476	0.636	1.763	4.855	7.254	924.076	314.186	3.14186	1064.08	3.61786	86.8431
Th Q9	1184	85	17.515	146.56	49.8304	0.498304	2.47	0.948	0.13	3.548	903.949	307.343	3.07343	1050.51	3.57173	86.0487
Th Q10	688	60	19.965	153.352	52.1397	0.521397	1.785	1.58	3.316	6.681	1702.17	578.736	5.78736	1855.52	6.30876	91.7354
Th Q11	688	80	20.285	161.34	54.8556	0.548556	2.091	3.147	3.282	8.52	2170.7	738.038	7.38038	2332.04	7.92894	93.0816
Th Q12	1324	70	11.55	110.352	37.5197	0.375197	1.934	2.526	4.25	8.71	4438.22	1508.99	15.0899	4548.57	15.4651	97.5739
Th Q13	1220	65	15.45	103.296	35.1206	0.351206	1.608	1.879	1.883	5.37	2736.31	930.344	9.30344	2839.6	9.65465	96.3623
Th Q14	1068	60	13.65	93.192	31.6853	0.316853	1.201	1.614	2.462	5.277	2688.92	914.232	9.14232	2782.11	9.45917	96.6503
Th Q15	1280	55	7.25	85.608	29.1067	0.291067	2.433	2.223	1.214	5.87	2991.08	1016.97	10.1697	3076.69	10.4607	97.2175
Th Q16	1016	60	13	135.232	45.9789	0.459789	1.518	1.486	1.559	4.563	2325.1	790.532	7.90532	2460.33	8.36511	94.5035
Th Q17	824	80	16.2	125.664	42.7258	0.427258	0.888	1.053	1.0312	2.9722	1514.5	514.929	5.14929	1640.16	5.57655	92.3383
Th Q18	900	70	22.2	123.776	42.0838	0.420838	0.768	0.795	2.47	4.033	2055.03	698.711	6.98711	2178.81	7.40795	94.3191
Th Q19	876	60	16.7	128.512	43.6941	0.436941	0.248	0.035	2.262	2.545	1296.82	440.917	4.40917	1425.33	4.84611	90.9837
Th Q20	828	60	19.9	94.096	31.9926	0.319926	0.246	0.321	2.346	2.913	1484.33	504.673	5.04673	1578.43	5.36665	94.0386
Th Q21	779.167	75	24.6	180	61.2	0.612	0.532	1.206	3.358	5.096	649.172	220.718	2.20718	829.172	2.81918	78.2916
Th Q22	991.667	85	20.9	152	51.68	0.5168	0.163	1.309	1.681	3.153	401.656	136.563	1.36563	553.656	1.88243	72.5461
Th Q23	608.333	55	28	130.42	44.3428	0.443428	0.661	0.752	1.59	3.003	382.548	130.066	1.30066	512.968	1.74409	74.5754
Th Q24	725	65	20.7	147.808	50.2547	0.502547	0.148	0.976	1.148	2.272	289.427	98.4051	0.984051	437.235	1.4866	66.1948
Th Q25	812	75	25	172.128	58.5235	0.585235	0.382	1.505	2.97	4.857	618.726	210.367	2.10367	790.854	2.6889	78.2352
Th Q26	860	85	23	157.652	53.6017	0.536017	0.621	0.864	1.477	2.962	377.325	128.29	1.2829	534.977	1.81892	70.5311
Th Q27	936	90	14.1	190.296	64.7006	0.647006	0.098	1.459	1.804	3.361	428.153	145.572	1.45572	618.449	2.10273	69.2301
Th Q28	820	85	18.74	487.104	165.615	1.65615	0.65	0.815	3.014	4.479	2282.29	775.98	7.7598	2769.4	9.41595	82.4112
Th Q29	700	75	17.607	135.68	46.1312	0.461312	0.468	0.403	1.742	2.613	1331.46	452.698	4.52698	1467.14	4.98829	90.7521
Th Q30	400	40	12.406	79.952	27.1837	0.271837	0.371	0.309	1.36	2.04	1039.49	353.427	3.53427	1119.44	3.8061	92.8579
Th Q31	500	85	22.4	198.4	67.456	0.67456	0.726	0.529	2.384	3.639	1854.27	630.451	6.30451	2052.67	6.97907	90.3345
Th Q32	888	85	21.05	228.8	77.792	0.77792	0.322	0.7	0.648	1.67	850.955	289.325	2.89325	1079.76	3.67117	78.81
Th Q33	868	80	20.3	296.96	100.966	1.00966	0.324	0.521	0.699	1.544	786.752	267.496	2.67496	1083.71	3.68462	72.5979
Th Q34	844	75	16.65	226.24	76.9216	0.769216	0.404	0.402	1.027	1.833	934.013	317.564	3.17564	1160.25	3.94486	80.5008
Th Q35	836	80	22.05	350.72	119.245	1.19245	0.324	0.402	0.652	1.378	702.166	238.736	2.38736	1052.89	3.57981	66.6896
Th Q36	1488	90	19.8	295.376	100.428	1.00428	0.601	0.656	0	1.257	444.798	151.231	1.51231	740.174	2.51659	60.0937
Th Q37	1664	75	18.5	341.04	115.954	1.15954	0.868	1.207	5.16	7.235	2560.16	870.453	8.70453	2901.2	9.86407	88.2448
Th Q38	1664	60	16	320.368	108.925	1.08925	0.835	0.938	2.961	1.773	627.389	213.312	2.13312	947.757	3.22237	66.1972
Th Q39	1568	75	17.9	288.496	98.0886	0.980886	2.256	0.581	2.992	5.829	2062.63	701.295	7.01295	2351.13	7.99384	87.7295
Th Q40	1200	55	14.5	304.992	103.697	1.03697	1.367	1.142	3.384	5.893	2085.28	708.995	7.08995	2390.27	8.12692	87.2403
ave	995.454	69.25	18.3817	202.054	68.6983	0.686983	0.904375	1.14375	2.0331	4.00721	1361.09	462.77	4.6277	1563.14	5.31468	82.8285
Stde	302.057	13.4236	4.38901	96.4968	32.8089	0.328089	0.715617	0.743507	1.22941	2.01397	909.49	309.226	3.09226	900.796	3.06271	10.5576
C. Interval	93.6066	4.15993	1.36014	29.9041	10.1674	0.101674	0.221768	0.230411	0.380992	0.624124	281.849	95.8285	0.958285	279.155	0.949125	3.27176
E. acoroides
Quadrat	Shoot.Den m-2	%C. Cover	Sht. Height (cm)	AGB g DW m-2	AGCorg g DWm-2	AGCorg MgC ha-1	Roots	Rhizome	Necromass	BGB (g DW)	BGB (g DW m-2)	BGCorg (g DW m-2)	BGCorg (Mg C ha-1)	T. B (g DW m-2)	T. Corg (Mg C ha-1)	% BGB
Ea Q1	300	50	73.7	118.88	40.4192	0.404192	0.644	0.446	1.375	2.019	1028.79	349.789	3.49789	1147.67	3.90208	89.6416
Ea Q2	280	35	37.6	61.76	20.9984	0.209984	0.343	0.782	1.927	2.27	1156.69	393.274	3.93274	1218.45	4.14272	94.9313
Ea Q3	252	25	37.05	43.664	14.8458	0.148458	0.204	4.652	2.167	2.371	1208.15	410.772	4.10772	1251.82	4.25618	96.5119
Ea Q4	200	20	31	54.864	18.6538	0.186538	0.256		3.742	3.998	2037.2	692.647	6.92647	2092.06	7.11301	97.3775
Ea Q5	376	35	47.8	82.592	28.0813	0.280813	0.641	1.598	3.353	3.994	2035.16	691.954	6.91954	2117.75	7.20035	96.1
Ea Q6	300	35	36.55	139.704	47.4994	0.474994	0.954	1.561	1.566	2.52	1284.08	436.586	4.36586	1423.78	4.84085	90.1878
Ea Q7	340	45	58.5	179.408	60.9987	0.609987	0.659	1.918	2.958	3.617	1843.06	626.639	6.26639	2022.47	6.87638	91.1292
Ea Q8	316	35	53.55	148.032	50.3309	0.503309	0.54	0.835	2.893	3.433	1749.3	594.762	5.94762	1897.33	6.45093	92.1979
Ea Q9	300	45	50.55	125.52	42.6768	0.426768	0.371	1.023	3.852	4.223	2151.85	731.628	7.31628	2277.37	7.74305	94.4884
Ea Q10	152	30	47.2	132.296	44.9806	0.449806	0.334	0.411	4.319	4.653	2370.96	806.125	8.06125	2503.25	8.51105	94.715
Ea Q11	252	55	71.55	235.92	80.2128	0.802128	0.536	1.03	2.077	2.613	1331.46	452.698	4.52698	1567.38	5.32911	84.9482
Ea Q12	320	50	66.6	196.624	66.8522	0.668522	0.566	0.359	3.361	3.927	2001.02	680.346	6.80346	2197.64	7.47199	91.053
Ea Q13	252	55	61.5	181.152	61.5917	0.615917	0.59	1.667	1.46	2.05	1044.59	355.159	3.55159	1225.74	4.16751	85.221
Ea Q14	328	60	62.55	92.52	31.4568	0.314568	0.481	1.86	3.21	3.691	1880.76	639.46	6.3946	1973.28	6.70917	95.3114
Ea Q15	384	65	64.15	113.072	38.4445	0.384445	0.505	2.041	0.7	1.205	614.013	208.764	2.08764	727.085	2.47209	84.4486
Ea Q16	112	40	70.6	142	48.28	0.4828	0.518	2.754	3.499	6.771	2395.97	814.628	8.14628	2537.97	8.62908	94.405
Ea Q17	256	35	68.15	303.456	103.175	1.03175	1.168	1.66	4.611	7.439	2632.34	894.996	8.94996	2935.8	9.98172	89.6636
Ea Q18	144	40	65.7	251.904	85.6474	0.856474	0.216	4.235	2.434	6.885	2436.31	828.344	8.28344	2688.21	9.13991	90.6293
Ea Q19	208	45	76.5	340.032	115.611	1.15611	0.481	3.632	3.907	8.02	2837.93	964.897	9.64897	3177.97	10.8051	89.3003
Ea Q20	192	55	69.7	314.304	106.863	1.06863	0.776	2.457	3.845	7.078	2504.6	851.564	8.51564	2818.9	9.58427	88.8501
Ea Q21	187.5	25	33	68	23.12	0.2312	0.802	4.029	2.802	7.633	972.357	330.601	3.30601	1040.36	3.53721	93.4638
Ea Q22	183.333	55	36	104	35.36	0.3536	0.106	4.036	5.011	9.153	1165.99	396.436	3.96436	1269.99	4.31796	91.8109
Ea Q23	187.5	70	61	104	35.36	0.3536	0.667	3.223	4.371	8.261	1052.36	357.801	3.57801	1156.36	3.93161	91.0062
Ea Q24	312.5	80	50	148	50.32	0.5032	1.039	5.273	2.956	9.268	1180.64	401.417	4.01417	1328.64	4.51737	88.8608
Ea Q25	183.333	55	61	148	50.32	0.5032	1.238	6.145	5.35	12.733	1622.04	551.493	5.51493	1770.04	6.01813	91.6386
Ea Q26	145.833	50	58	91.272	31.0325	0.310325	0.494	1.404	0.656	2.554	325.35	110.619	1.10619	416.622	1.41652	78.0924
Ea Q27	154.167	45	56	43.712	14.8621	0.148621	0.908	0.368	2.216	3.492	444.841	151.246	1.51246	488.553	1.66108	91.0528
Ea Q28	320.833	60	32	137.38	46.7092	0.467092	0.784	0	7.059	7.843	999.108	339.697	3.39697	1136.49	3.86406	87.9119
Ea Q29	162.5	50	40	133.504	45.3914	0.453914	1.029	0.871	4.524	6.424	818.344	278.237	2.78237	951.848	3.23628	85.9742
Ea Q30	241.667	60	45	136.076	46.2658	0.462658	1.835	3.348	5.163	10.346	1317.96	448.107	4.48107	1454.04	4.94373	90.6415
Ea Q31	229.167	40	65	158.484	53.8846	0.538846	1.398	3.259	13.719	18.376	2340.89	795.903	7.95903	2499.38	8.49788	93.6591
Ea Q32	166.667	40	54.31	144.828	49.2415	0.492415	1.551	2.244	9.055	12.85	1636.94	556.561	5.56561	1781.77	6.05802	91.8717
Ea Q33	145.833	50	60.5	122.472	41.6405	0.416405	0.511	1.873	5.178	7.562	963.312	327.526	3.27526	1085.78	3.69167	88.7204
Ea Q34	154.167	35	77.92	104.74	35.6116	0.356116	0.71	1.874	2.505	5.089	1296.56	440.831	4.40831	1401.3	4.76442	92.5255
Ea Q35	166.667	50	71.63	97.64	33.1976	0.331976	0.576	0.699	3.852	5.127	1306.24	444.122	4.44122	1403.88	4.7732	93.045
Ea Q36	512	75	50.78	233.872	79.5165	0.795165	0.518	2.754	3.499	6.771	2395.97	814.628	8.14628	2629.84	8.94145	91.107
Ea Q37	480	60	55.11	287.024	97.5882	0.975882	1.168	1.66	4.611	7.439	2632.34	894.996	8.94996	2919.37	9.92585	90.1683
Ea Q38	240	50	52.45	227.696	77.4166	0.774166	0.216	4.235	2.434	6.885	2436.31	828.344	8.28344	2664	9.05761	91.4529
Ea Q39	288	35	54.38	232.672	79.1085	0.791085	0.481	3.632	3.907	8.02	2837.93	964.897	9.64897	3070.61	10.4401	92.4226
Ea Q40	192	50	40.81	256.592	87.2413	0.872413	0.776	2.457	3.845	7.078	2504.6	851.564	8.51564	2761.19	9.38805	90.7072
ave	247.942	47.25	55.1347	155.942	53.0202	0.530202	0.68975	2.26423	3.74922	6.14203	1669.86	567.752	5.67752	1825.8	6.20772	90.9311
Stde	91.6036	13.3949	13.2068	76.5367	26.0225	0.260225	0.380645	1.49918	2.2853	3.49015	702.312	238.786	2.38786	757.537	2.57563	3.68857
C. Interval	28.3877	4.15104	4.09276	23.7185	8.0643	0.080643	0.117961	0.464592	0.708208	1.08159	217.645	73.9992	0.739992	234.759	0.79818	1.14308
T. ciliatum
Quadrat	Shoot.Den m-2	%C. Cover	Sht. Height (cm)	AGB g DW m-2	AGCorg g DWm-2	AGCorg MgC ha-1	Roots	Rhizome	Necromass	BGB (g DW)	BGB (g DW m-2)	BGCorg (g DW m-2)	BGCorg (Mg C ha-1)	T. B (g DW m-2)	T. Corg (Mg C ha-1)	% BGB
Tc Q1	1200	85	29.75	205.76	69.9584	0.699584	1.17	3.314	2.83	4	2038.22	692.994	6.92994	2243.98	7.62952	90.8306
Tc Q2	800	65	61.1	219.84	74.7456	0.747456	1.053	2.51	0.735	1.788	911.083	309.768	3.09768	1130.92	3.84514	80.561
Tc Q3	752	65	45.9	234.4	79.696	0.79696	1.566	2.897	2.19	3.756	1913.89	650.721	6.50721	2148.29	7.30417	89.089
Tc Q4	500	65	40.55	405.76	137.958	1.37958	1.338	3.1	1.261	2.599	1324.33	450.273	4.50273	1730.09	5.88231	76.5469
Tc Q5	433	60	53.17	398.128	135.364	1.35364	1.578	1.337	2.938	4.516	2301.15	782.39	7.8239	2699.27	9.17753	85.2506
Tc Q6	583	70	50	302.024	102.688	1.02688	0.392	0.85	4.28	4.672	2380.64	809.417	8.09417	2682.66	9.12105	88.7416
Tc Q7	583	70	49.02	410.224	139.476	1.39476	1.332	1.142	3.158	4.49	2287.9	777.885	7.77885	2698.12	9.17362	84.7959
Tc Q8	583	65	38.87	351.016	119.345	1.19345	2.323	1.345	2.736	5.059	2577.83	876.464	8.76464	2928.85	9.95809	88.0152
Tc Q9	533	65	55.15	390.488	132.766	1.32766	0.869	2.537	1.122	1.991	1014.52	344.938	3.44938	1405.01	4.77703	72.2075
Tc Q10	487	65	59.59	292.984	99.6146	0.996146	0.686	1.259	2.004	2.69	1370.7	466.038	4.66038	1663.68	5.65653	82.3895
Tc Q11	367	55	60.33	319.408	108.599	1.08599	1.218	1.425	1.427	2.645	1347.77	458.242	4.58242	1667.18	5.66841	80.8414
Tc Q12	350	55	62.33	460.776	156.664	1.56664	0.989	0.776	1.066	2.055	1047.13	356.025	3.56025	1507.91	5.12689	69.4427
Tc Q13	600	60	33.58	272.384	92.6106	0.926106	1.236	1.98	1.888	3.124	1591.85	541.228	5.41228	1864.23	6.33839	85.3889
Tc Q14	600	55	43.64	281.096	95.5726	0.955726	1.941	2.674	2.2	4.141	2110.06	717.422	7.17422	2391.16	8.12994	88.2444
Tc Q15	433	60	56.35	521.28	177.235	1.77235	0.639	2.341	1.061	1.7	866.242	294.522	2.94522	1387.52	4.71757	62.4309
Tc Q16	608	50	30.4	316.68	107.671	1.07671	0.561	1.657	2.056	2.617	1333.5	453.391	4.53391	1650.18	5.61062	80.8094
Tc Q17	304	40	28.1	199.032	67.6709	0.676709	1.07	1.412	1.186	2.256	1149.55	390.848	3.90848	1348.59	4.58519	85.2414
Tc Q18	704	60	30.7	135.08	45.9272	0.459272	0.429	2.331	2.275	2.704	1377.83	468.464	4.68464	1512.91	5.14391	91.0715
Tc Q19	768	70	37.1	246.208	83.7107	0.837107	0.338	1.773	1.466	1.804	919.236	312.54	3.1254	1165.44	3.96251	78.8743
Tc Q20	624	40	34.7	272.616	92.6894	0.926894	0.833	1.252	1.343	2.176	1108.79	376.989	3.76989	1381.41	4.69678	80.2653
Tc Q21	295.833	65	12.71	340	115.6	1.156	1.47	1.402	1.353	4.225	538.217	182.994	1.82994	878.217	2.98594	61.2852
Tc Q22	558.333	85	29.06	222.78	75.7452	0.757452	0.157	0.699	0	0.856	109.045	37.0752	0.370752	331.825	1.1282	32.8621
Tc Q23	183.333	45	24.79	114.616	38.9694	0.389694	0.349	0.548	0.244	1.141	145.35	49.4191	0.494191	259.966	0.883885	55.9112
Tc Q24	308.333	50	28.97	265.52	90.2768	0.902768	0.415	0.648	0.386	1.449	184.586	62.7592	0.627592	450.106	1.53036	41.0094
Tc Q25	320.833	40	29.47	165.756	56.357	0.56357	0.754	2.033	0.345	3.132	398.981	135.654	1.35654	564.737	1.92011	70.649
Tc Q26	408.333	65	28.12	206.4	70.176	0.70176	0.359	0	1.38568	1.74468	222.252	75.5657	0.755657	428.652	1.45742	51.8491
Tc Q27	404.167	65	34.64	260.968	88.7291	0.887291	0.608	0.359	0.161	1.128	143.694	48.8561	0.488561	404.662	1.37585	35.5097
Tc Q28	391.667	50	27.14	228.24	77.6016	0.776016	1.032	0.231		1.263	160.892	54.7032	0.547032	389.132	1.32305	41.3463
Tc Q29	258.333	45	30.01	190.408	64.7387	0.647387	0.461	1.001	0	1.462	186.242	63.3223	0.633223	376.65	1.28061	49.447
Tc Q30	308.333	65	30.22	358.36	121.842	1.21842	0.8	1.05	1.461	3.311	421.783	143.406	1.43406	780.143	2.65249	54.0649
Tc Q31	345.833	80	15.98	404.44	137.51	1.3751	1.571	1.276	0.239	3.086	393.121	133.661	1.33661	797.561	2.71171	49.2904
Tc Q32	375	75	26.45	372.24	126.562	1.26562	1.33	1.208	0.502	3.04	387.261	131.669	1.31669	759.501	2.5823	50.9889
Tc Q33	900	50	39.05	502.32	170.789	1.70789	0.405	0.716	1.273	2.394	1219.87	414.757	4.14757	1722.19	5.85545	70.8325
Tc Q34	700	55	31.22	288.352	98.0397	0.980397	0.326		0.837	1.163	592.611	201.488	2.01488	880.963	2.99528	67.2686
Tc Q35	700	55	34.44	183.184	62.2826	0.622826	0.471		1.06	1.531	780.127	265.243	2.65243	963.311	3.27526	80.9839
Tc Q36	576	75	29.4	301.984	102.675	1.02675	0.083	0.559	2.801	3.443	1218.33	414.232	4.14232	1520.31	5.16907	80.1367
Tc Q37	1008	80	30.3	564.512	191.934	1.91934	0.79	1.205	1.087	3.082	1090.59	370.8	3.708	1655.1	5.62734	65.8926
Tc Q38	656	80	24.7	456.496	155.209	1.55209	0.466	0.828	4.78	6.074	2149.33	730.771	7.30771	2605.82	8.8598	82.4817
Tc Q39	400	60	29.8	427.952	145.504	1.45504	0.199	0.928	2.228	3.355	1187.19	403.645	4.03645	1615.14	5.49148	73.5038
Tc Q40	320	70	32.4	239.936	81.5782	0.815782	0.6	0.774	2.479	3.853	1363.41	463.56	4.6356	1603.35	5.45138	85.0353
ave	530.758	61.875	36.73	308.241	104.802	1.04802	0.855175	1.40466	1.58574	2.78789	1096.63	372.853	3.72853	1404.87	4.77655	71.0347
Stde	216.279	11.9662	12.4533	108.083	36.7484	0.367484	0.520487	0.824064	1.11206	1.23976	714.479	242.923	2.42923	750.234	2.55079	16.6883
C. Interval	67.0242	3.70828	3.85926	33.4948	11.3882	0.113882	0.161297	0.255375	0.344626	0.3842	221.415	75.2812	0.752812	232.496	0.790485	5.17166
S.isoetifolium
Quadrat	Shoot den/m2	T. % Cover	Shoot Height (cm)	ABG gmDwm-2	AGCorg g DWm-2	AGCorg MgC ha-1	Roots (Dwgm)	Rhizome(Dwg)	Necr(Dw g)	T. BGB	BGBgDw(m-2)	BGCorg (g DW m-2)	BGCorg (Mg C ha-1)	T. B (g DW m-2)	T. Corg (Mg C ha-1)	% BGB
Si Q1	3800	75	19.36	393.296	133.721	1.33721	0.621	1.211	0.66	2.492	1269.81	431.735	4.31735	1663.1	5.65456	76.3517
Si Q2	5400	90	28.93	476	161.84	1.6184	1.208	1.375	0.049	2.632	1341.15	455.99	4.5599	1817.15	6.1783	73.8051
Si Q3	6100	90	30.65	410.656	139.623	1.39623	0.63	0.718	0.442	1.79	912.102	310.115	3.10115	1322.76	4.49738	68.9546
Si Q4	2700	35	18.96	137.6	46.784	0.46784	0.838	1.254	0.113	2.205	1123.57	382.013	3.82013	1261.17	4.28797	89.0895
Si Q5	3300	75	27.09	233.456	79.375	0.79375	0.288	1.411	0.171	1.87	952.866	323.975	3.23975	1186.32	4.0335	80.321
Si Q6	3800	75	25.65	428.448	145.672	1.45672	0.406	1.625	0	2.031	1034.9	351.868	3.51868	1463.35	4.9754	70.7215
Si Q7	4600	90	27.27	385.408	131.039	1.31039	0.904	2.061	0.893	3.858	1965.86	668.392	6.68392	2351.27	7.99431	83.6085
Si Q8	4300	80	26.22	282.944	96.201	0.96201	0.643	1.672	2.1	4.415	2249.68	764.892	7.64892	2532.63	8.61093	88.828
Si Q9	4700	75	32.78	366.512	124.614	1.24614	1.116	1.377	0.626	3.119	1589.3	540.362	5.40362	1955.81	6.64976	81.2604
Si Q10	4600	80	28.27	329.344	111.977	1.11977	0.667	1.52	1.422	3.609	1838.98	625.254	6.25254	2168.32	7.3723	84.8111
Si Q11	2900	45	22.07	131.952	44.8637	0.448637	0.817	0.605	1.211	2.633	1341.66	456.163	4.56163	1473.61	5.01027	91.0457
Si Q12	6100	80	27.59	266.784	90.7066	0.907066	0.916	0.752	3.66	5.328	2714.9	923.068	9.23068	2981.69	10.1377	91.0526
Si Q13	3900	80	25.65	331.424	112.684	1.12684	1.27	2.048	1.286	4.604	2345.99	797.636	7.97636	2677.41	9.1032	87.6215
Si Q14	2500	45	26.07	324.304	110.263	1.10263	0.677	1.29	1.466	3.433	1749.3	594.762	5.94762	2073.6	7.05025	84.3604
Si Q15	3900	65	25.57	214.032	72.7709	0.727709	1.11	0.891	2.45	4.451	2268.03	771.129	7.71129	2482.06	8.439	91.3768
Si Q16	4720	60	11.05	130.688	44.4339	0.444339	0.361	0.588	1.149	2.098	1069.04	363.475	3.63475	1199.73	4.78375	89.1069
Si Q17	5760	80	16.95	294.384	100.091	1.00091	0.729	1.003	3.335	5.067	2581.91	877.85	8.7785	2876.29	12.1135	89.7652
Si Q18	6304	80	12.97	295.2	100.368	1.00368	0.549	0.566	2.064	3.179	1619.87	550.757	5.50757	1915.07	7.57157	84.5854
Si Q19	3408	60	15.1	308.112	104.758	1.04758	0.309	0.471	2.58	3.36	1712.1	582.115	5.82115	2020.21	8.40115	84.7485
Si Q20	4224	70	17.2	276.24	93.9216	0.939216	1.028	0.437	2.451	3.916	1995.41	678.441	6.78441	2271.65	9.23541	87.8397
ave	4350.8	71.5	23.27	300.839	102.285	1.02285	0.75435	1.14375	1.4064	3.3045	1683.82	572.499	5.72499	1984.66	7.10501	83.9627
Stde	1139.8	15.4834	6.14995	97.264	33.0698	0.330698	0.295338	0.504298	1.09476	1.08776	554.273	188.453	1.88453	560.141	2.19179	6.79845
C. Interval	499.531	6.78579	2.69528	42.627	14.4932	0.144932	0.129435	0.221014	0.479791	0.476724	242.917	82.5916	0.825916	245.488	0.960577	2.9795

## Sheet: Carbon density graphs
T. hemprichii	Depth	vegetated	C.Interval	unvegetated	C. Interval
	2.5	0.093719	0.0252389	0.0299466	0.0262489
	7.5	0.120839	0.0295944	0.0210927	0.0184882
	12.5	0.108945	0.0307485	0.0111685	0.00978948
	17.5	0.123306	0.039216	0.0319534	0.0280078
	22.5	0.11793	0.0226904	0.046665	0.0409029
	27.5	0.130198	0.0403662	0.0318731	0.0279375
	32.5	0.131766	0.030381	0.0518688	0.0454642
	37.5	0.140209	0.0357185	0.053995	0.0473278
	42.5	0.128484	0.0363598	0.0432016	0.0378672
	47.5	0.104885	0.0275405	0.0359672	0.0315261
E. acoroides	Depth	Vegetated	con. Int	Un-vegetated	C. Interval
	2.5	0.132683	0.0671457	0.00862138	0.00937891
	7.5	0.156316	0.0791053	0.0150128	0.00469584
	12.5	0.153197	0.0775269	0.0290252	0.0200868
	17.5	0.170029	0.0860448	0.0605852	0.0197991
	22.5	0.161753	0.0818566	0.0516258	0.0195067
	27.5	0.166544	0.0842813	0.0630277	0.011844
	32.5	0.151638	0.0767379	0.049904	0.0222898
	37.5	0.171979	0.0870316	0.0446501	0.0172375
	42.5	0.132462	0.0670338	0.0362413	0.0131526
	47.5	0.115964	0.0586847	0.0274276	0.0151853
T.ciatum	Depth	Vegetated	Confide In	Un-vegetated	C. Interval
	2.5	0.113917	0.0254462	0.0490124	0.010872
	7.5	0.104348	0.0340927	0.0506487	0.00820857
	12.5	0.114519	0.0380852	0.0489326	0.00799828
	17.5	0.108383	0.0382468	0.0411441	0.0130688
	22.5	0.120532	0.0376747	0.0384107	0.0109505
	27.5	0.127867	0.0304207	0.0415688	0.0111197
	32.5	0.174021	0.0687822	0.0417904	0.00840382
	37.5	0.128602	0.0302225	0.0370506	0.00645052
	42.5	0.128516	0.0249579	0.0480209	0.00510971
	47.5	0.109645	0.0328398	0.0494849	0.0106024
S.isoetifolium	Depth	Vegetated	C.Interval	Unvegetated	C. Interval
	2.5	0.050789	0.011875	0.0143289	0.0134967
	7.5	0.0841698	0.0327431	0.0123501	0.00778894
	12.5	0.102622	0.064227	0.0168166	0.00918132
	17.5	0.0726091	0.0164502	0.0145941	0.00950158
	22.5	0.105161	0.0518267	0.0237128	0.0144909
	27.5	0.108753	0.0456166	0.0258201	0.014913
	32.5	0.0838832	0.0231597	0.0141144	0.0140572
	37.5	0.0624814	0.0156852	0.014735	0.0100099
	42.5	0.0646974	0.012972	0.0230792	0.0121307
	47.5	0.0646427	0.0189025	0.0189306	0.00394999
							S1 Fig. 2: Carbon density (mean ± 95% C.I.) along depth profiles in the vegetated and un-vegetated areas associated with the dominant seagrass species of Gazi Bay (a. T. hemprichii b. E. acoroides c. T. ciliatum d. S. isoetifolium).
