# Supplementary material for: Carbon storage in the seagrass meadows of Gazi Bay, Kenya
Source: PLoS One. 2017 May 10;12(5):e0177001. doi: 10.1371/journal.pone.0177001 (PMC5425023; doi:10.1371/journal.pone.0177001)
Supplement: S2 File — (XLSX) [file pone.0177001.s002.xlsx]

## Sheet: Sheet2
Species	Th	Core
		1	345.695			Species	Vegetated	C. interval	Un-vegetated	C. interval
		2	291.993			T. hemprichii	233.774	42.1187	51.7945	14.9439
		3	248.357			E. acoroides	295.741	63.5944	51.7927	25.1719
		4	190.407			T. ciliatum	252.101	53.2187	61.7048	11.2495
		5	162.965			S. isoetifolium	160.654	40.3396	33.3909	4.45109
		6	199.127
		7	206.952
		8	178.603
		9	140.54
		10	237.264
		11	350.509
		12	426.599
		13	164.472
		14	128.23
		15	234.896
		AVE	233.774
		STDEV	85.9581
		CONF	42.1187
Species	Ea	1	368.222
		2	274.543
		3	359.38
		4	186.516
		5	113.675
		6	167.868
		7	230.407							S2 Fig3: Variation in sediment Corg between the vegetated and un-vegetated areas for the four seagrass species (means± 95% C.I.).
		8	309.808
		9	314.671
		10	367.369
		11	595.575
		12	476.329
		13	188.316
		14	247.133
		15	236.306
		AVE	295.741
		STDEV	125.666
		CONF	63.5944
Species	Tc	Core
		1	349.332
		2	137.315
		3	462.612
		4	371.989
		5	305.586
		6	236.283
		7	296.633
		8	367.241
		9	260.845
		10	178.626
		11	145.656
		12	154.285
		13	247.237
		14	113.452
		15	154.429
		AVE	252.101
		STDEV	105.163
		CONF	53.2187
Species	si	Core
		1	192.07
		2	97.6478
		3	162.072
		4	126.262
		5	307.186
		6	143.7
		7	163.21
		8	378.028
		9	105.163
		10	110.48
		11	132.372
		12	154.891
		13	122.367
		14	116.817
		15	97.5456
		AVE	160.654
		STDEV	79.7131
		CONF	40.3396
