# Supplementary material for: Carbon storage in the seagrass meadows of Gazi Bay, Kenya
Source: PLoS One. 2017 May 10;12(5):e0177001. doi: 10.1371/journal.pone.0177001 (PMC5425023; doi:10.1371/journal.pone.0177001)
Supplement: S3 File — (XLSX) [file pone.0177001.s003.xlsx]

## Sheet: Sheet1
		Species	Biomass			Species	Sediment carbon	Biomass carbon	Total carbon	% Sediment	% of Biomass
		S. Isoetifolium				T. hemprichii	233.774	5.3	239.074	97.7831	2.21689
		T. Hemprichii				E. acoroides	295.741	6.2	301.941	97.9466	2.05338
		E. acoroides				T. ciliatum	252.101	4.8	256.901	98.1316	1.86842
		T. ciliatum				S. isoetifolium	160.654	7.1	167.754	95.7676	4.23238
						Average	235.568	5.85	241.418	97.4072	2.59277
						Stdev	48.7583	0.87892	48.308	0.954626	0.954626
						C.interval	24.3791	0.43946	24.154	0.477313	0.477313
		S3 Fig. 4: Relative % of the total Corg (± 95% C.I) for the sediment and the biomass associated with the four dominant seagrass species at Gazi Bay.
